# Supplementary material for: Identification and Validation of Novel CAF Markers in Breast Cancer
Source: Research Square preprint supplement (doi:10.21203/rs.3.rs-6479762/v1), 2025-05-29
Supplement: Supplementary file 1 [file 19617f4dfd29497ff5293582.xlsx]

## Sheet: sTable1
Patient and sample characteristics
ID	age	tissue	grade	T	N	ER	PR	HER2	FISH	Ki67	type
2T	45	ductal carcinoma in situ	high grade	Tis	N0	-	-	3+		0.3	HER2
5T	48	invasive dutal cancer	Ⅱ	T2	N3	2+ 60%	1+ 30%	2+	-	0.1	Luminal A
9T	68	invasive dutal cancer	Ⅱ	T2	N1	-	-	3+		0.5	HER2
10T	55	invasive dutal cancer	Ⅱ	T1	N1	-	-	2+	-	0.25	TNBC
11T	47	invasive lobular cancer	Ⅱ	T1	N1	2+ 90%	1+ 60%	1+		0.05	Luminal A
18T	56	ductal carcinoma in situ	intermediate grade	Tis	N0	2+ 80%	1+ 40%	-		0.07	Luminal A
23T	65	invasive dutal cancer	Ⅱ	T2	N0	-	-	3+		0.4	HER2
24T	50	invasive dutal cancer	Ⅱ	T2	N0	-	-	2+	+	0.05	HER2
25T	43	invasive lobular cancer	Ⅱ	T1	N0	2+ 70%	2+ 40%	-		0.05	Luminal A
26T	42	invasive dutal cancer	Ⅱ	T1	N0	2+ 80%	2+ 70%	1+		0.2	Luminal A
30T	48	invasive dutal cancer	Ⅲ	T2	N0	1+ 30%	1+ 5%	1+		0.2	Luminal B
33T	38	invasive dutal cancer	Ⅱ	T2	N0	2+ 80%	3+ 90%	1+		0.05	Luminal A
35T	55	invasive dutal cancer	Ⅱ	T1	N0	-	2+ 50%	1+		0.05	Luminal A
36T	55	invasive dutal cancer	Ⅲ	T2	N3	3+ 90%	3+ 80%	2+	-	0.2	Luminal A
37T	61	invasive dutal cancer	Ⅱ	T3	N0	1+ 2%	-	3+		0.3	HER2
39T	68	invasive dutal cancer	Ⅱ	T1	N3	-	-	1+		0.1	TNBC
40T	49	invasive dutal cancer	Ⅱ	T1	N0	2+ 80%	1+ 1%	3+		0.2	Luminal B
45T	51	invasive dutal cancer	Ⅲ	T2	N0	-	-	1+		0.7	TNBC
48T	33	invasive dutal cancer	Ⅱ	T1	N1	2+ 80%	2+ 50%	-		0.4	Luminal B
49T	50	ductal carcinoma in situ	high grade	Tis	N0	-	-	1+		0.2	TNBC
50T	49	invasive dutal cancer	Ⅱ	T1	N0	3+ 90%	1+ 20%	2+	-	0.1	Luminal A
56T	48	invasive dutal cancer	Ⅲ	T3	N3	1+ 60%	1+ 20%	2+	-	0.03	Luminal B
58T	53	invasive dutal cancer	Ⅲ	T1	N0	-	-	1+		0.15	TNBC
62T	68	invasive dutal cancer	Ⅲ	T2	N1	3+ 90%	2+ 30%	3+		0.35	Luminal B
64T	49	invasive dutal cancer	Ⅱ	T2	N1	3+ 80%	3+ 75%	1+		0.1	Luminal A
65T	46	invasive dutal cancer	Ⅱ	T1	N1	3+ 80%	1+ 1%	2+	-	0.3	Luminal B
68T	49	invasive dutal cancer	Ⅱ	T1	N0	2+ 90%	2+ 60%	1+		0.05	Luminal A
74T	58	invasive dutal cancer	Ⅲ	T2	N2	3+ 80%	1+ 5%	1+		0.2	Luminal B
78T	67	invasive dutal cancer	Ⅱ	T2	N0	-	-	1+		0.01	TNBC
80T	56	invasive lobular cancer	Ⅱ	T2	N0	-	-	2+	+	0.5	HER2
88T	73	invasive dutal cancer	Ⅲ	T2	N0	-	-	-		0.6	TNBC
94T	40	invasive dutal cancer	Ⅱ	T1	N0	3+ 90%	2+ 60%	2+	-	0.15	Luminal A
98T	55	invasive dutal cancer	Ⅱ	T1	N0	-	-	3+		0.5	HER2
99T	36	invasive dutal cancer	Ⅱ	T1	N0	2+ 90%	1+ 1%	2+	-	0.2	Luminal B
101T	45	invasive dutal cancer	Ⅱ	T2	N0	1+ 1%	1+ 5%	3+		0.3	Luminal B
109T	63	ductal carcinoma in situ	high grade	Tis	N0	3+ 80%	-	2+	-	0.3	Luminal B
115T	45	invasive dutal cancer	Ⅱ	T2	N1	3+ 90%	-	2+	-	0.2	Luminal B
116T	55	invasive dutal cancer	Ⅲ	T3	N1	-	-	3+		0.4	HER2
130T	59	invasive dutal cancer	Ⅲ	T1	N0	-	-	1+		0.2	TNBC
131T	74	ductal carcinoma in situ	intermediate grade	Tis	N0	3+ 90%	1+ 20%	1+		0.05	Luminal B
132T	40	ductal carcinoma in situ	high grade	Tis	N0	3+ 90%	3+ 50%	2+	-	0.3	Luminal A
133T	76	ductal carcinoma in situ	intermediate grade	Tis	N0	2+ 60%	2+ 50%	-		0.1	Luminal A
137T	46	ductal carcinoma in situ	intermediate grade	Tis	N0	3+ 90%	1+ 10%	2+	-	0.05	Luminal B
141T	51	ductal carcinoma in situ	high grade	Tis	N0	1+ 1%	-	3+		0.15	HER2
146T	37	ductal carcinoma in situ	high grade	Tis	N0	2+ 10%	2+ 40%	3+		0.05	Luminal A
147T	40	ductal carcinoma in situ	high grade	Tis	N0	2+ 80%	3+ 80%	1+		0.1	Luminal A
148T	51	ductal carcinoma in situ	high grade	Tis	N0	2+ 90%	3+ 90%	2+	-	0.1	Luminal A
154T	40	ductal carcinoma in situ	high grade	Tis	N0	2+ 60%	3+ 60%	3+		0.3	Luminal B
181T	47	invasive dutal cancer	Ⅲ	T3	N3	-	-	1+		0.4	TNBC
182T	46	invasive dutal cancer	Ⅲ	T2	N0	3+ 80%	2+ 50%	1+		0.1	Luminal A
183T	65	invasive dutal cancer	Ⅱ	T2	N1	-	-	-		0.1	TNBC
184T	64	ductal carcinoma in situ	high grade	Tis	N0	3+ 90%	1+ 30%	2+	-	0.1	Luminal A
185T	48	invasive dutal cancer	Ⅱ	T1	N0	3+ 90%	2+ 80%	-		0.1	Luminal A
186T	51	invasive dutal cancer	Ⅲ	T2	N2	1+ 10%	-	3+		0.4	Luminal B
187T	68	invasive dutal cancer	Ⅱ	T1	N1	3+ 90%	3+ 85%	2+	-	0.05	Luminal A
188T	35	invasive dutal cancer	Ⅱ	T1	N2	3+ 80%	3+ 60%	-		0.2	Luminal B
189T	62	invasive dutal cancer	Ⅱ	T1	N2	3+ 70%	1+ 3%	1+		0.1	Luminal A
190T	57	invasive dutal cancer	Ⅱ	T1	N1	-	-	3+		0.3	HER2
191T	62	invasive dutal cancer	Ⅲ	T2	N0	-	-	-		0.2	TNBC
192T	31	ductal carcinoma in situ	intermediate grade	Tis	N0	3+ 80%	3+ 60%	-		0.08	Luminal A
5F	26	fibro
6F	23	fibro
10F	22	fibro
11F	36	fibro
15F	28	fibro
16F	35	fibro
17F	40	fibro
31F	26	fibro
32F	29	fibro
33F	31	fibro

## Sheet: sTable2
Candidate CAFs-related genes in breast cancer
Symbol	Name	Ensembl	Gene type	Location
ADH1B	Alcohol Dehydrogenase 1B (Class I), Beta Polypeptide	ENSG00000196616	protein coding	4q23
CCDC80	coiled-coil domain containing 80	ENSG00000091986	protein coding	3q13.2
COL10A1	collagen type X alpha 1 chain	ENSG00000123500	protein coding	6q22.1
COL11A1	collagen type XI alpha 1 chain	ENSG00000060718	protein coding	1p21.1
COL14A1	collagen type XIV alpha 1 chain	ENSG00000187955	protein coding	8q24.12
COL8A1	collagen type VIII alpha 1 chain	ENSG00000144810	protein coding	3q12.1
COMP	cartilage oligomeric matrix protein	ENSG00000105664	protein coding	19p13.11
CXCL12	C-X-C motif chemokine ligand 12	ENSG00000107562	protein coding	10q11.21
DCN	decorin	ENSG00000011465	protein coding	12q21.33
DIO2	iodothyronine deiodinase 2	ENSG00000211448	protein coding	14q31.1
DLK1	delta like non-canonical Notch ligand 1	ENSG00000185559	protein coding	14q32.2
DPT	dermatopontin	ENSG00000143196	protein coding	1q24.2
FBLN5	fibulin 5	ENSG00000140092	protein coding	14q32.12
VEGFD	vascular endothelial growth factor D	ENSG00000165197	protein coding	Xp22.2
FXYD1	FXYD domain containing ion transport regulator 1	ENSG00000266964	protein coding	19q13.12
IGF1	insulin like growth factor 1	ENSG00000017427	protein coding	12q23.2
IGF2	insulin like growth factor 2	ENSG00000167244	protein coding	11p15.5
ITM2A	integral membrane protein 2A	ENSG00000078596	protein coding	Xq21.1
MFAP4	microfibril associated protein 4	ENSG00000166482	protein coding	17p11.2
NR2F1	nuclear receptor subfamily 2 group F member 1	ENSG00000175745	protein coding	5q15
OGN	osteoglycin	ENSG00000106809	protein coding	9q22.31
PDGFRA	platelet derived growth factor receptor alpha	ENSG00000134853	protein coding	4q12
PDGFRL	platelet derived growth factor receptor like	ENSG00000104213	protein coding	8p22
RARRES2	retinoic acid receptor responder 2	ENSG00000106538	protein coding	7q36.1
SULF1	sulfatase 1	ENSG00000137573	protein coding	8q13.2-q13.3
THY1	Thy-1 cell surface antigen	ENSG00000154096	protein coding	11q23.3
TNXB	tenascin XB	ENSG00000168477	protein coding	6p21.33-p21.32
CCN5	cellular communication network factor 5	ENSG00000064205	protein coding	20q13.12
Gene-specific information was obtained from the "Entrez Gene" NCBI's database (http://www.ncbi.nlm.nih.gov/gene)

## Sheet: sTable3
The results of feature selection using six methods
Method	Variables	Accuracy	Kappa	AccuracySD	KappaSD	Selected
Random Forest	1	0.889011	0.778291	0.0724219	0.144564
	2	0.962088	0.924169	0.0399964	0.080007
	3	0.984615	0.969412	0.0324336	0.0644857	*
	4	0.977473	0.955126	0.0363035	0.072306
	5	0.984615	0.969412	0.0324336	0.0644857
	6	0.984615	0.969412	0.0324336	0.0644857
	7	0.984615	0.969412	0.0324336	0.0644857
	8	0.984615	0.969412	0.0324336	0.0644857
	9	0.984615	0.969412	0.0324336	0.0644857
	10	0.984615	0.969412	0.0324336	0.0644857
	11	0.977473	0.955126	0.0363035	0.072306
	12	0.984615	0.969412	0.0324336	0.0644857
	13	0.977473	0.955126	0.0363035	0.072306
	14	0.977473	0.955126	0.0363035	0.072306
	15	0.977473	0.955126	0.0363035	0.072306
Generalized Additive Models	1	0.741758	0.483722	0.0836898	0.169302
	2	0.830769	0.660074	0.107913	0.216843
	3	0.852747	0.705113	0.0616104	0.124328
	4	0.904945	0.809515	0.0330737	0.0659318
	5	0.912637	0.825178	0.0446714	0.0893233
	6	0.91978	0.839468	0.0638246	0.127891
	7	0.941209	0.881583	0.0777494	0.157557
	8	0.941209	0.881583	0.0911731	0.184105
	9	0.941758	0.883329	0.0566997	0.113472
	10	0.904396	0.80993	0.0708012	0.138773
	11	0.94011	0.88099	0.0703378	0.137277
	12	0.955495	0.910523	0.0510493	0.102434
	13	0.970879	0.94148	0.0504943	0.101285	*
	14	0.963736	0.927194	0.0509671	0.102184
	15	0.963187	0.925818	0.051416	0.103319
Linear Discriminant Analysis	1	0.80696	0.614347	0.0980427	0.19288
	2	0.828297	0.657047	0.0905367	0.178724
	3	0.843132	0.685596	0.0785888	0.158074
	4	0.879396	0.757334	0.0852431	0.173227
	5	0.91804	0.835679	0.0650881	0.130717
	6	0.904396	0.807334	0.0986362	0.200051
	7	0.925824	0.848277	0.106298	0.221154
	8	0.933516	0.865129	0.0950424	0.19397
	9	0.91859	0.836332	0.0864052	0.173713
	10	0.91859	0.836332	0.0864052	0.173713
	11	0.941758	0.883329	0.0740434	0.148143
	12	0.941758	0.883329	0.0740434	0.148143
	13	0.948901	0.898339	0.0842511	0.167782	*
	14	0.948901	0.898339	0.0842511	0.167782
	15	0.934615	0.869767	0.0798942	0.159136
Logistic Regression	1	0.765751	0.530834	0.113614	0.227344
	2	0.818132	0.633449	0.145543	0.292751
	3	0.890659	0.780197	0.0708131	0.142438
	4	0.935165	0.87042	0.0786821	0.157349
	5	0.942308	0.884706	0.0739097	0.147793
	6	0.964286	0.928571	0.0607026	0.121405
	7	0.964286	0.928571	0.0607026	0.121405
	8	0.948901	0.896864	0.060802	0.123388
	9	0.978571	0.957143	0.0482106	0.0964212	*
	10	0.957143	0.914286	0.0602339	0.120468
	11	0.957143	0.914286	0.0602339	0.120468
	12	0.942308	0.884706	0.065794	0.131559
	13	0.949451	0.898992	0.0590528	0.118061
	14	0.934615	0.869043	0.0627246	0.125491
	15	0.934615	0.869043	0.0627246	0.125491
Naive Bayes	1	0.933516	0.867014	0.0643089	0.127925
	2	0.925275	0.849973	0.0800096	0.16049
	3	0.955495	0.910523	0.0383699	0.0771857
	4	0.962637	0.924809	0.0394347	0.0793966	*
	5	0.955495	0.910523	0.0510493	0.102434
	6	0.932967	0.865637	0.0548717	0.10899
	7	0.947253	0.894208	0.0514258	0.10214
	8	0.954945	0.909871	0.0531325	0.105435
	9	0.932418	0.864645	0.0763563	0.152342
	10	0.925275	0.85108	0.0725793	0.143879
	11	0.925275	0.85108	0.0725793	0.143879
	12	0.91044	0.821144	0.0868777	0.172734
	13	0.917582	0.83543	0.0849232	0.168776
	14	0.917582	0.83543	0.0849232	0.168776
	15	0.917582	0.83543	0.0849232	0.168776
Bagged Trees	1	0.904304	0.808867	0.0488577	0.096904
	2	0.94826	0.896611	0.0359036	0.0717372
	3	0.955403	0.910896	0.0385584	0.0770331
	4	0.962546	0.925182	0.0396366	0.0791735
	5	0.962546	0.925182	0.0396366	0.0791735
	6	0.94826	0.896611	0.0492225	0.098394
	7	0.962546	0.925182	0.0396366	0.0791735
	8	0.94826	0.896611	0.0492225	0.098394
	9	0.964286	0.928571	0.0505076	0.101015	*
	10	0.956593	0.913277	0.0503213	0.100576
	11	0.962546	0.925182	0.0396366	0.0791735
	12	0.955952	0.911905	0.0508339	0.101668
	13	0.94826	0.896611	0.0492225	0.098394
	14	0.962546	0.925182	0.0396366	0.0791735
	15	0.94826	0.896242	0.0359036	0.0720289

## Sheet: sTable4
Optimal variables selected by 6 methods
Method	Selected Feature Genes
Random Forest	TNXB	FXYD1	SULF1
Naive Bayes	TNXB	FXYD1	FBLN5	DPT
Logistic Regression	THY1	FXYD1	SULF1	DLK1	DPT	PDGFRA	PDGFRL	IGF2	FBLN5
Bagged Trees	TNXB	FXYD1	SULF1	FBLN5	DPT	DLK1	PDGFRA	THY1	COL14A1
Generalized Additive Models	COL14A1	FXYD1	SULF1	DPT	PDGFRA	THY1	PDGFRL	IGF2	RARRES2	NR2F1	FBLN5	DIO2	DLK1
Linear Discriminant Analysis	TNXB	FXYD1	SULF1	DPT	FBLN5	DLK1	PDGFRA	RARRES2	COL14A1	NR2F1	THY1	CCN5	PDGFRL

## Sheet: sTable5
Performance of the ML models
Dataset	Method	Accuracy	Kappa	Sensitivity	Specificity	PPV	NPV	Precision	Recall	F1
TCGA_test	rf	0.9655(0.8809, 0.9958)	0.931	0.931	1	1	0.9355	1	0.931	0.9643
	glm	0.9483(0.8562, 0.9892)	0.8966	0.931	0.9655	0.9643	0.9333	0.9643	0.931	0.9474
	svm	0.9655(0.8809, 0.9958)	0.931	0.931	1	1	0.9355	1	0.931	0.9643
	xgboost	0.9483(0.8562, 0.9892)	0.8966	0.931	0.9655	0.9643	0.9333	0.9643	0.931	0.9474
	nb	0.9655(0.8809, 0.9958)	0.931	0.9655	0.9655	0.9655	0.9655	0.9655	0.9655	0.9655
	KNN	0.9483(0.8562, 0.9892)	0.8966	0.8966	1	1	0.9062	1	0.8966	0.9455
TCGA_all	rf	0.9319(0.916-0.9456)	0.6772	0.9257	1	1	0.5531	1	0.9257	0.9614
	glm	0.937(0.9216-0.9502)	0.9331	0.9798	0.998	0.574	0.99705	0.998	0.9331	0.9645
	svm	0.9234(0.9067-0.938)	0.6486	0.9164	1	1	0.5238	1	0.9164	0.9564
	xgboost	0.92(0.903-0.9349)	0.6354	0.9136	0.9899	0.999	0.5131	0.999	0.9136	0.9544
	nb	0.9345(0.9188-0.9479)	0.6684	0.9229	1	1	0.544	0.999	0.9294	0.9629
	KNN	0.9294(0.9132-0.9433)	0.7279	0.9697	0.94517	0.61935	0.99706	1	0.9229	0.9599
GSE233242	rf	0.6744(0.5648-0.7716)	0.3488	0.3488	1	1	0.6056	1	0.3488	0.5172
	glm	0.5349(0.4241-0.6432)	0.0698	0.06977	1	1	0.51807	1	0.06977	0.13043
	svm	0.5(0.3902-0.6098)	0	0	1	NA	0.5	NA	0	NA
	xgboost	0.7209((0.6138-0.8123))	0.4419	0.4419	1	1	0.6418	1	0.4419	0.6129
	nb	0.6977(0.5892-0.7921)	0.3953	0.6744	0.7209	0.7073	0.6889	0.7073	0.6744	0.6905
	KNN	0.5(0.3902-0.6098)	0	0	1	NA	0.5	NA	0	NA
GSE65194	rf	0.9085(0.8536-0.9479)	0.5008	0.915	0.8182	0.9859	0.4091	0.9859	0.915	0.9492
	glm	0.939(0.8907-0.9704)	0.6573	0.9346	1	1	0.5238	1	0.9346	0.9662
	svm	0.0671(0.034-0.1168)	0	0	1	NA	0.06707	NA	0	NA
	xgboost	0.8902(0.8321-0.9336)	0.3001	0.9216	0.4545	0.9592	0.2941	0.9592	0.9216	0.94
	nb	0.8963(0.8392-0.9384)	0.0517	0.95425	0.09091	0.9359	0.125	0.9359	0.9542	0.945
	KNN	0.7683(0.6961-0.8305)	0.1469	0.5621	1	1	0.141	1	0.5621	0.7197
abbreviation：PPV：Positive Predictive Value; NPV: Negtive Predictive Value

## Sheet: sTable6
Top 20 DEGs of different types of fibroblast
Symbol	Name	Ensembl	Gene type	Location	cluster	avg_log2FC	p_val	p_val_adj
FN1	fibronectin 1	ENSG00000115414	protein coding	2q35	mCAFs	3.95668	0	0
MMP11	matrix metallopeptidase 11	ENSG00000099953	protein coding	22q11.23	mCAFs	3.81551	0	0
COL1A1	collagen type I alpha 1 chain	ENSG00000108821	protein coding	17q21.33	mCAFs	3.80217	0	0
COL1A2	collagen type I alpha 2 chain	ENSG00000164692	protein coding	7q21.3	mCAFs	3.29583	0	0
SPARC	secreted protein acidic and cysteine rich	ENSG00000113140	protein coding	5q33.1	mCAFs	3.2652	0	0
CTHRC1	collagen triple helix repeat containing 1	ENSG00000164932	protein coding	8q22.3	mCAFs	3.26504	0	0
TAGLN	transgelin	ENSG00000149591	protein coding	11q23.3	mCAFs	3.24494	0	0
COL11A1	collagen type XI alpha 1 chain	ENSG00000060718	protein coding	1p21.1	mCAFs	3.24257	0	0
ACTA2	actin alpha 2, smooth muscle	ENSG00000107796	protein coding	10q23.31	mCAFs	3.07322	0	0
COL3A1	collagen type III alpha 1 chain	ENSG00000168542	protein coding	2q32.2	mCAFs	3.05186	0	0
COL10A1	collagen type X alpha 1 chain	ENSG00000123500	protein coding	6q22.1	mCAFs	2.98604	0	0
COL5A2	collagen type V alpha 2 chain	ENSG00000204262	protein coding	2q32.2	mCAFs	2.88626	0	0
IGKC	immunoglobulin kappa constant	ENSG00000211592	protein coding	2p11.2	mCAFs	2.68343	0	0
POSTN	periostin	ENSG00000133110	protein coding	13q13.3	mCAFs	2.68223	0	0
COL12A1	collagen type XII alpha 1 chain	ENSG00000111799	protein coding	6q13-q14.1	mCAFs	2.64482	0	0
BGN	biglycan	ENSG00000182492	protein coding	Xq28	mCAFs	2.61335	0	0
ASPN	asporin	ENSG00000106819	protein coding	9q22.31	mCAFs	2.60943	0	0
COL5A1	collagen type V alpha 1 chain	ENSG00000130635	protein coding	9q34.3	mCAFs	2.56442	0	0
SDC1	syndecan 1	ENSG00000115884	protein coding	2p24.1	mCAFs	2.48014	0	0
AEBP1	AE binding protein 1	ENSG00000106624	protein coding	7p13	mCAFs	2.46058	0	0
CXCL8	C-X-C motif chemokine ligand 8	ENSG00000169429	protein coding	4q13.3	normal	6.3595	0	0
CXCL1	C-X-C motif chemokine ligand 1	ENSG00000163739	protein coding	4q13.3	normal	6.2293	0	0
MMP3	matrix metallopeptidase 3	ENSG00000149968	protein coding	11q22.2	normal	5.59786	0	0
CXCL3	C-X-C motif chemokine ligand 3	ENSG00000163734	protein coding	4q13.3	normal	5.46899	0	0
CXCL2	C-X-C motif chemokine ligand 2	ENSG00000081041	protein coding	4q13.3	normal	4.9875	0	0
TNFAIP6	TNF alpha induced protein 6	ENSG00000123610	protein coding	2q23.3	normal	4.51028	0	0
IER3	immediate early response 3	ENSG00000137331	protein coding	6p21.33	normal	3.84656	0	0
HSPA6	heat shock protein family A (Hsp70) member 6	ENSG00000173110	protein coding	1q23.3	normal	3.75135	0	0
NFKBIA	NFKB inhibitor alpha	ENSG00000100906	protein coding	14q13.2	normal	3.58489	0	0
HMOX1	heme oxygenase 1	ENSG00000100292	protein coding	22q12.3	normal	3.56907	0	0
IL6	interleukin 6	ENSG00000136244	protein coding	7p15.3	normal	3.44879	0	0
GEM	GTP binding protein overexpressed in skeletal muscle	ENSG00000164949	protein coding	8q22.1	normal	3.4484	0	0
AKR1C1	aldo-keto reductase family 1 member C1	ENSG00000187134	protein coding	10p15.1	normal	3.42104	0	0
MMP12	matrix metallopeptidase 12	ENSG00000262406	protein coding	11q22.2	normal	3.37365	0	0
MMP10	matrix metallopeptidase 10	ENSG00000166670	protein coding	11q22.2	normal	3.28813	0	0
HSP90AB1	heat shock protein 90 alpha family class B member 1	ENSG00000096384	protein coding	6p21.1	normal	3.26768	0	0
HSPA1A	heat shock protein family A (Hsp70) member 1A	ENSG00000204389	protein coding	6p21.33	normal	3.25912	0	0
PLIN2	perilipin 2	ENSG00000147872	protein coding	9p22.1	normal	3.00303	0	0
MEDAG	mesenteric estrogen dependent adipogenesis	ENSG00000102802	protein coding	13q12.3	normal	2.94944	0	0
CEBPB	CCAAT enhancer binding protein beta	ENSG00000172216	protein coding	20q13.13	normal	2.91946	0	0
MGP	matrix Gla protein	ENSG00000111341	protein coding	12p12.3	iCAFs	2.0574	0	0
NR2F1	nuclear receptor subfamily 2 group F member 1	ENSG00000175745	protein coding	5q15	iCAFs	1.7835	0	0
CXCL14	C-X-C motif chemokine ligand 14	ENSG00000145824	protein coding	5q31.1	iCAFs	1.67856	0	0
TXNIP	thioredoxin interacting protein	ENSG00000265972	protein coding	1q21.1	iCAFs	1.66612	0	0
SELENOP	selenoprotein P	ENSG00000250722	protein coding	5p12	iCAFs	1.55182	0	0
SCGB2A2	secretoglobin family 2A member 2	ENSG00000110484	protein coding	11q12.3	iCAFs	2.59467	1.55075e-305	4.09102e-301
NFIA	nuclear factor I A	ENSG00000162599	protein coding	1p31.3	iCAFs	1.40882	5.94721e-244	1.56893e-239
SPRY1	sprouty RTK signaling antagonist 1	ENSG00000164056	protein coding	4q28.1	iCAFs	1.55396	8.45955e-244	2.23171e-239
IGF1	insulin like growth factor 1	ENSG00000017427	protein coding	12q23.2	iCAFs	1.79716	1.9032e-226	5.02084e-222
IGFBP4	insulin like growth factor binding protein 4	ENSG00000141753	protein coding	17q21.2	iCAFs	1.31432	3.3561e-189	8.85374e-185
CD81	CD81 molecule	ENSG00000110651	protein coding	11p15.5	iCAFs	1.24845	1.25802e-187	3.31877e-183
CCDC80	coiled-coil domain containing 80	ENSG00000091986	protein coding	3q13.2	iCAFs	1.44168	1.67963e-185	4.43103e-181
C3	complement C3	ENSG00000125730	protein coding	19p13.3	iCAFs	1.69747	5.2389e-160	1.38207e-155
FOS	Fos proto-oncogene, AP-1 transcription factor subunit	ENSG00000170345	protein coding	14q24.3	iCAFs	1.3929	4.28671e-150	1.13088e-145
PTGDS	prostaglandin D2 synthase	ENSG00000107317	protein coding	9q34.3	iCAFs	2.1692	1.12989e-146	2.98077e-142
SFRP1	secreted frizzled related protein 1	ENSG00000104332	protein coding	8p11.21	iCAFs	1.47863	8.74132e-140	2.30605e-135
COL14A1	collagen type XIV alpha 1 chain	ENSG00000187955	protein coding	8q24.12	iCAFs	1.25284	8.73994e-130	2.30568e-125
F2R	coagulation factor II thrombin receptor	ENSG00000181104	protein coding	5q13.3	iCAFs	1.24769	6.16529e-129	1.62647e-124
APOD	apolipoprotein D	ENSG00000189058	protein coding	3q29	iCAFs	1.45363	9.12567e-86	2.40744e-81
PLA2G2A	phospholipase A2 group IIA	ENSG00000188257	protein coding	1p36.13	iCAFs	1.84542	1.52972e-70	4.03555e-66

## Sheet: sTable7
Top 20 DEGs of different types of CAFs
Symbol	Name	Ensembl	Gene type	Location	cluster	avg_log2FC	p_val	p_val_adj
HSPB1	heat shock protein family B (small) member 1	ENSG00000106211	protein coding	7q11.23	Luminal_mCAFs	1.86672	0	0
MT-ND2	mitochondrially encoded NADH dehydrogenase 2	ENSG00000198763		mitochondrial	Luminal_mCAFs	1.83844	0	0
MT-ND1	mitochondrially encoded NADH dehydrogenase 1	ENSG00000198888		mitochondrial	Luminal_mCAFs	1.83179	0	0
ACTG1	actin gamma 1	ENSG00000184009		17q25.3	Luminal_mCAFs	1.83149	0	0
RPLP1	ribosomal protein lateral stalk subunit P1	ENSG00000137818		15q23	Luminal_mCAFs	1.7997	0	0
MT-CO1	mitochondrially encoded cytochrome c oxidase I	ENSG00000198804		mitochondrial	Luminal_mCAFs	1.7547	0	0
MT-CO3	mitochondrially encoded cytochrome c oxidase III	ENSG00000198938		mitochondrial	Luminal_mCAFs	1.72773	0	0
MT-CYB	mitochondrially encoded cytochrome b	ENSG00000198727		mitochondrial	Luminal_mCAFs	1.72165	0	0
MT-ND4	mitochondrially encoded NADH dehydrogenase 4	ENSG00000198886		mitochondrial	Luminal_mCAFs	1.69814	0	0
MT-CO2	mitochondrially encoded cytochrome c oxidase II	ENSG00000198712		mitochondrial	Luminal_mCAFs	1.67715	0	0
RPL10	ribosomal protein L10	ENSG00000147403		Xq28	Luminal_mCAFs	1.60246	0	0
RPS2	ribosomal protein S2	ENSG00000140988		16p13.3	Luminal_mCAFs	1.5814	0	0
KLF6	KLF transcription factor 6	ENSG00000067082		10p15.2	Luminal_mCAFs	1.57132	0	0
RPS19	ribosomal protein S19	ENSG00000105372		19q13.2	Luminal_mCAFs	1.56884	0	0
RPL28	ribosomal protein L28	ENSG00000108107		19q13.42	Luminal_mCAFs	1.56694	0	0
RPL27A	ribosomal protein L27a	ENSG00000166441		11p15.4	Luminal_mCAFs	1.55385	0	0
RPS16	ribosomal protein S16	ENSG00000105193		19q13.2	Luminal_mCAFs	1.52018	0	0
RPL18A	ribosomal protein L18a	ENSG00000105640		19p13.11	Luminal_mCAFs	1.48987	0	0
RPS15	ribosomal protein S15	ENSG00000115268		19p13.3	Luminal_mCAFs	1.48564	0	0
SDC1	syndecan 1	ENSG00000115884		2p24.1	Luminal_mCAFs	1.58164	1.09e-298	2.87e-294
BST2	bone marrow stromal cell antigen 2	ENSG00000130303		19p13.11	non-Luminal_mCAFs	2.13346	0	0
HLA-A	major histocompatibility complex, class I, A	ENSG00000206503		6p22.1	non-Luminal_mCAFs	1.17817	8.29e-269	2.19e-264
HLA-C	major histocompatibility complex, class I, C	ENSG00000204525		6p21.33	non-Luminal_mCAFs	1.23874	7.24e-266	1.91e-261
ISG15	ISG15 ubiquitin like modifier	ENSG00000187608		1p36.33	non-Luminal_mCAFs	1.72139	4.91e-248	1.3e-243
IFI27	interferon alpha inducible protein 27	ENSG00000165949		14q32.12	non-Luminal_mCAFs	1.2259	7.67e-246	2.02e-241
HLA-B	major histocompatibility complex, class I, B	ENSG00000234745		6p21.33	non-Luminal_mCAFs	1.12864	1.28e-242	3.38e-238
IFI44L	interferon induced protein 44 like	ENSG00000137959		1p31.1	non-Luminal_mCAFs	1.25803	1.31e-184	3.47e-180
MMP1	matrix metallopeptidase 1	ENSG00000196611		11q22.2	non-Luminal_mCAFs	2.88965	6.6e-168	1.74e-163
IFI6	interferon alpha inducible protein 6	ENSG00000126709		1p35.3	non-Luminal_mCAFs	1.14641	1.6e-166	4.23e-162
TPM2	tropomyosin 2	ENSG00000198467		9p13.3	non-Luminal_mCAFs	1.0494	1.05e-151	2.77e-147
IL32	interleukin 32	ENSG00000008517		16p13.3	non-Luminal_mCAFs	1.09159	6.04e-149	1.59e-144
C11orf96	chromosome 11 open reading frame 96	ENSG00000187479		11p11.2	non-Luminal_mCAFs	1.05138	5.11e-112	1.35e-107
TIMP1	TIMP metallopeptidase inhibitor 1	ENSG00000102265		Xp11.3	non-Luminal_mCAFs	1.26478	1.67e-103	4.4e-99
TSC22D3	TSC22 domain family member 3	ENSG00000157514		Xq22.3	non-Luminal_mCAFs	1.0842	2.71e-90	7.16e-86
CST1	cystatin SN	ENSG00000170373		20p11.21	non-Luminal_mCAFs	1.91204	1.16e-69	3.05e-65
MT2A	metallothionein 2A	ENSG00000125148		16q13	non-Luminal_mCAFs	1.48799	5.24e-69	1.38e-64
CXCL9	C-X-C motif chemokine ligand 9	ENSG00000138755		4q21.1	non-Luminal_mCAFs	1.29199	3.69e-64	9.72e-60
CCL5	C-C motif chemokine ligand 5	ENSG00000271503		17q12	non-Luminal_mCAFs	1.25325	3.15e-60	8.31e-56
CD74	CD74 molecule	ENSG00000019582		5q33.1	non-Luminal_mCAFs	1.31339	1.7e-54	4.47e-50
HLA-DRA	major histocompatibility complex, class II, DR alpha	ENSG00000204287		6p21.32	non-Luminal_mCAFs	1.1099	7.5e-30	1.98e-25
APOD	apolipoprotein D	ENSG00000189058		3q29	Luminal_iCAFs	3.1406	0	0
JUNB	JunB proto-oncogene, AP-1 transcription factor subunit	ENSG00000171223		19p13.13	Luminal_iCAFs	2.42755	0	0
ZFP36	ZFP36 ring finger protein	ENSG00000128016		19q13.2	Luminal_iCAFs	2.4066	0	0
EGR1	early growth response 1	ENSG00000120738		5q31.2	Luminal_iCAFs	2.36695	0	0
FOS	Fos proto-oncogene, AP-1 transcription factor subunit	ENSG00000170345		14q24.3	Luminal_iCAFs	2.36038	0	0
JUN	Jun proto-oncogene, AP-1 transcription factor subunit	ENSG00000177606		1p32.1	Luminal_iCAFs	2.10226	0	0
ZFP36L2	ZFP36 ring finger protein like 2	ENSG00000152518		2p21	Luminal_iCAFs	1.91811	0	0
RPL39	ribosomal protein L39	ENSG00000198918		Xq24	Luminal_iCAFs	1.6083	0	0
RPL21	ribosomal protein L21	ENSG00000122026		13q12.2	Luminal_iCAFs	1.55499	0	0
DCN	decorin	ENSG00000011465		12q21.33	Luminal_iCAFs	1.56805	4.82e-297	1.27e-292
CEBPD	CCAAT enhancer binding protein delta	ENSG00000221869	protein coding	8q11.21	Luminal_iCAFs	1.8297	4.04e-275	1.07e-270
DUSP1	dual specificity phosphatase 1	ENSG00000120129	protein coding	5q35.1	Luminal_iCAFs	1.70025	3.18e-243	8.4e-239
NFKBIA	NFKB inhibitor alpha	ENSG00000100906	protein coding	14q13.2	Luminal_iCAFs	1.49286	3.42e-241	9.01e-237
SCGB2A2	secretoglobin family 2A member 2	ENSG00000110484	protein coding	11q12.3	Luminal_iCAFs	2.2363	4.66e-237	1.23e-232
ITM2A	integral membrane protein 2A	ENSG00000078596	protein coding	Xq21.1	Luminal_iCAFs	1.50236	5.57e-230	1.47e-225
IER2	immediate early response 2	ENSG00000160888	protein coding	19p13.13	Luminal_iCAFs	1.47837	2.41e-211	6.34e-207
NR4A1	nuclear receptor subfamily 4 group A member 1	ENSG00000123358	protein coding	12q13.13	Luminal_iCAFs	1.72329	2.16e-208	5.69e-204
JUND	JunD proto-oncogene, AP-1 transcription factor subunit	ENSG00000130522	protein coding	19p13.11	Luminal_iCAFs	1.58134	1.81e-198	4.78e-194
BTG2	BTG anti-proliferation factor 2	ENSG00000159388	protein coding	1q32.1	Luminal_iCAFs	1.48912	7.89e-197	2.08e-192
FOSB	FosB proto-oncogene, AP-1 transcription factor subunit	ENSG00000125740	protein coding	19q13.32	Luminal_iCAFs	1.57983	3.45e-187	9.11e-183
PLA2G2A	phospholipase A2 group IIA	ENSG00000188257	protein coding	1p36.13	non-Luminal_iCAFs	4.75875	0	0
CFD	complement factor D	ENSG00000197766	protein coding	19p13.3	non-Luminal_iCAFs	4.26992	0	0
CXCL14	C-X-C motif chemokine ligand 14	ENSG00000145824	protein coding	5q31.1	non-Luminal_iCAFs	3.27555	0	0
PI16	peptidase inhibitor 16	ENSG00000164530	protein coding	6p21.2	non-Luminal_iCAFs	3.22907	0	0
C3	complement C3	ENSG00000125730	protein coding	19p13.3	non-Luminal_iCAFs	2.40877	0	0
MGP	MGP	ENSG00000111341	protein coding	12p12.3	non-Luminal_iCAFs	2.25984	0	0
TNXB	tenascin XB	ENSG00000168477	protein coding	6p21.33-p21.32	non-Luminal_iCAFs	1.99061	0	0
SOD3	superoxide dismutase 3	ENSG00000109610	protein coding	4p15.2	non-Luminal_iCAFs	2.13589	8.92e-295	2.35e-290
PLAC9	placenta associated 9	ENSG00000189129	protein coding	10q22.3	non-Luminal_iCAFs	2.04959	2.6e-282	6.85e-278
IGF1	insulin like growth factor 1	ENSG00000017427	protein coding	12q23.2	non-Luminal_iCAFs	2.03651	1.19e-208	3.13e-204
IGKC	immunoglobulin kappa constant	ENSG00000211592	protein coding	2p11.2	non-Luminal_iCAFs	3.68584	2.3e-195	6.07e-191
PTGDS	prostaglandin D2 synthase	ENSG00000107317	protein coding	9q34.3	non-Luminal_iCAFs	2.38783	6.88e-185	1.81e-180
CXCL2	C-X-C motif chemokine ligand 2	ENSG00000081041	protein coding	4q13.3	non-Luminal_iCAFs	2.05312	1.03e-163	2.73e-159
CLU	clusterin	ENSG00000120885	protein coding	8p21.1	non-Luminal_iCAFs	2.28224	2.49e-151	6.58e-147
APOE	apolipoprotein E	ENSG00000130203	protein coding	19q13.32	non-Luminal_iCAFs	2.49859	2.89e-117	7.62e-113
IGFBP6	insulin like growth factor binding protein 6	ENSG00000167779	protein coding	12q13.13	non-Luminal_iCAFs	2.0958	8.13e-97	2.15e-92
CCL19	C-C motif chemokine ligand 19	ENSG00000172724	protein coding	9p13.3	non-Luminal_iCAFs	2.04297	9.95e-64	2.63e-59
IGLC2	immunoglobulin lambda constant 2	ENSG00000211677	protein coding	22q11.22	non-Luminal_iCAFs	2.19984	3.81e-56	1e-51
IGLC3	immunoglobulin lambda constant 3	ENSG00000211679	protein coding	22q11.22	non-Luminal_iCAFs	2.24525	3.65e-32	9.63e-28
IGHG1	immunoglobulin heavy constant gamma 1	ENSG00000211896	protein coding	14q32.33	non-Luminal_iCAFs	2.34257	4.46e-23	1.18e-18

## Sheet: sTable8
lumimal-mCAFs high sensitive drugs								lumimal-mCAFs low sensitive drugs								lumimal-icaf high sensitive drugs								lumimal-icaf low sensitive drugs
ID	drugs	preferred.drug.names	MoAs	targets	studies	switch.point	residuals.mean	ID	drugs	preferred.drug.names	MoAs	targets	studies	switch.point	residuals.mean	ID	drugs	preferred.drug.names	MoAs	targets	studies	switch.point	residuals.mean	ID	drugs	preferred.drug.names	MoAs	targets	studies	switch.point	residuals.mean
sig-20896	DASATINIB ANHYDROUS; DASATINIB (ANH.); DASATINIB; BMS DASATINIB; ANHYDROUS DASATINIB; ANH. DASATINIB; N-(2-CHLORO-6-METHYLPHENYL)-2-({6-[4-(2-HYDROXYETHYL)PIPERAZIN-1-YL]-2-METHYLPYRIMIDIN-4-YL}AMINO)-1,3-THIAZOLE-5-CARBOXAMIDE; DASATINIB (ANHYDROUS)	DASATINIB	Multi-kinase inhibitor; SRC inhibitor; EPH receptor inhibitor; KIT inhibitor; Fusion protein inhibitor; PDGFR inhibitor	ABL; ABL1; ABL2; BCR-ABL1; BLK; EPHA2; FGR; FRK; FYN; HCK; KIT; LCK; LYN; PDGFR; PDGFRB; SRC; SRMS; STAT5B; YES1	GDSC	0.59	1.21	sig-21333	N-(2-AMINOPHENYL)-4-(N-(PYRIDIN-3-YLMETHOXYCARBONYL)AMINOMETHYL)BENZAMIDE; N-[[4-[(2-AMINOANILINO)-OXOMETHYL]PHENYL]METHYL]CARBAMIC ACID 3-PYRIDINYLMETHYL ESTER; ENTINOSTAT	ENTINOSTAT	Chromatin agent	HDAC1; HDAC2; HDAC3; HDAC6; HDAC8	CTRP	0.52	-1.1	sig-21333	N-(2-AMINOPHENYL)-4-(N-(PYRIDIN-3-YLMETHOXYCARBONYL)AMINOMETHYL)BENZAMIDE; N-[[4-[(2-AMINOANILINO)-OXOMETHYL]PHENYL]METHYL]CARBAMIC ACID 3-PYRIDINYLMETHYL ESTER; ENTINOSTAT	ENTINOSTAT	Chromatin agent	HDAC1; HDAC2; HDAC3; HDAC6; HDAC8	CTRP	0.52	3.56	sig-20896	DASATINIB ANHYDROUS; DASATINIB (ANH.); DASATINIB; BMS DASATINIB; ANHYDROUS DASATINIB; ANH. DASATINIB; N-(2-CHLORO-6-METHYLPHENYL)-2-({6-[4-(2-HYDROXYETHYL)PIPERAZIN-1-YL]-2-METHYLPYRIMIDIN-4-YL}AMINO)-1,3-THIAZOLE-5-CARBOXAMIDE; DASATINIB (ANHYDROUS)	DASATINIB	Multi-kinase inhibitor; SRC inhibitor; EPH receptor inhibitor; KIT inhibitor; Fusion protein inhibitor; PDGFR inhibitor	ABL; ABL1; ABL2; BCR-ABL1; BLK; EPHA2; FGR; FRK; FYN; HCK; KIT; LCK; LYN; PDGFR; PDGFRB; SRC; SRMS; STAT5B; YES1	GDSC	0.59	-3.92
sig-21105	SKI-II	SKI-II	Lipid metabolism inhibitor; Sphingolipid metabolism inhibitor	SPHK1	PRISM	0.58	1.09	sig-21097	MUBRITINIB	MUBRITINIB	ErbB inhibitor	EGFR; ERBB2	PRISM	0.46	-1	sig-21097	MUBRITINIB	MUBRITINIB	ErbB inhibitor	EGFR; ERBB2	PRISM	0.46	3.26	sig-21105	SKI-II	SKI-II	Lipid metabolism inhibitor; Sphingolipid metabolism inhibitor	SPHK1	PRISM	0.58	-3.55
sig-20903	SB505124	SB505124	TGFbeta receptor inhibitor	ACVR1B; ACVR1C; TGFBR1	GDSC	0.52	0.78	sig-20997	WYE-125132	WYE-125132	PI3K/AKT/mTOR signaling inhibitor	MTOR	PRISM	0.47	-0.94	sig-20997	WYE-125132	WYE-125132	PI3K/AKT/mTOR signaling inhibitor	MTOR	PRISM	0.47	3.06	sig-20903	SB505124	SB505124	TGFbeta receptor inhibitor	ACVR1B; ACVR1C; TGFBR1	GDSC	0.52	-2.53
sig-21296	GDC-0152	GDC-0152	Pro-apoptotic agent	BIRC2; BIRC3; BIRC7; XIAP	PRISM	0.59	0.76	sig-21133	CD-437	CD-437	Retinoid acid receptor agonist; Pro-apoptotic agent	RARG	CTRP	0.51	-0.92	sig-21133	CD-437	CD-437	Retinoid acid receptor agonist; Pro-apoptotic agent	RARG	CTRP	0.51	2.98	sig-21296	GDC-0152	GDC-0152	Pro-apoptotic agent	BIRC2; BIRC3; BIRC7; XIAP	PRISM	0.59	-2.45
sig-21159	GSK1070916	GSK1070916	Cell cycle arrest; Aurora kinase inhibitor	AURKA; AURKB; AURKC; CYP2D6; CYP3A4	PRISM	0.52	0.7	sig-20902	CYTOGEM; GEBINA; CELGEM; TABIN; 2'-DEOXY-2',2'-DIFLUOROCYTIDINE; 4-AMINO-1-((2R,4R,5R)-3,3-DIFLUORO-4-HYDROXY-5-(HYDROXYMETHYL)-TETRAHYDROFURAN-2-YL)PYRIMIDIN-2(1H)-ONE; GITRABIN; ACYTABIN; RIBOZAR; ONCOGEM; XTROZ; GEMCIRED; ABINE; 2',2'-DIFLUORODEOXYCYTIDINE; JEMTA; GEMCITABINE; ERIOGEM; DAPLAX; DERCIN; NALLIAN; GRAMAGEN; FOTINEX; ABINGEM; CELZAR; GEMITA; GEZT; GEMBIO	GEMCITABINE	DNA replication inhibitor	CMPK1; RRM1; RRM2; TYMS	GDSC	0.52	-0.89	sig-20902	CYTOGEM; GEBINA; CELGEM; TABIN; 2'-DEOXY-2',2'-DIFLUOROCYTIDINE; 4-AMINO-1-((2R,4R,5R)-3,3-DIFLUORO-4-HYDROXY-5-(HYDROXYMETHYL)-TETRAHYDROFURAN-2-YL)PYRIMIDIN-2(1H)-ONE; GITRABIN; ACYTABIN; RIBOZAR; ONCOGEM; XTROZ; GEMCIRED; ABINE; 2',2'-DIFLUORODEOXYCYTIDINE; JEMTA; GEMCITABINE; ERIOGEM; DAPLAX; DERCIN; NALLIAN; GRAMAGEN; FOTINEX; ABINGEM; CELZAR; GEMITA; GEZT; GEMBIO	GEMCITABINE	DNA replication inhibitor	CMPK1; RRM1; RRM2; TYMS	GDSC	0.52	2.9	sig-21159	GSK1070916	GSK1070916	Cell cycle arrest; Aurora kinase inhibitor	AURKA; AURKB; AURKC; CYP2D6; CYP3A4	PRISM	0.52	-2.29
sig-21322	SCH-900776	SCH-900776	Cell cycle arrest; Cell cycle checkpoint inhibitor; ; CDK inhibitor	CDK2; CHEK1	PRISM	0.44	0.7	sig-20881	CYTOSINE ARABINOSIDE; ARA-C; CYTOSINE-1-BETA-D-ARABINOFURANOSIDE; CYTOSAR-U; CYTOSINE-螔-D-ARABINOFURANOSIDE; 4-AMINO-1-BETA-D-ARABINOFURANOSYL-2(1H)-PYRIMIDINONE; CYTARABINE; 1-BETA-D-ARABINOFURANOSYLCYTOSINE	CYTARABINE	DNA damaging agent; DNA replication inhibitor		GDSC	0.51	-0.86	sig-20912	PEVONEDISTAT	PEVONEDISTAT	NAE inhibitor	NAE1	GDSC	0.45	2.81	sig-21322	SCH-900776	SCH-900776	Cell cycle arrest; Cell cycle checkpoint inhibitor; ; CDK inhibitor	CDK2; CHEK1	PRISM	0.44	-2.27
sig-21055	LCL-161	LCL-161	Pro-apoptotic agent	BIRC2; XIAP	PRISM	0.48	0.66	sig-20879	21,22-SECOCAMPTOTHECIN-21-OIC ACID LACTONE; CAMPTOTHECINE; (+)-CAMPTOTHECINE; 20(S)-CAMPTOTHECINE; (+)-CAMPTOTHECIN; D-CAMPTOTHECIN; (S)-(+)-CAMPTOTHECIN	CAMPTOTHECIN	Topoisomerase inhibitor; DNA replication inhibitor	TOP1	GDSC	0.5	-0.86	sig-20881	CYTOSINE ARABINOSIDE; ARA-C; CYTOSINE-1-BETA-D-ARABINOFURANOSIDE; CYTOSAR-U; CYTOSINE-螔-D-ARABINOFURANOSIDE; 4-AMINO-1-BETA-D-ARABINOFURANOSYL-2(1H)-PYRIMIDINONE; CYTARABINE; 1-BETA-D-ARABINOFURANOSYLCYTOSINE	CYTARABINE	DNA damaging agent; DNA replication inhibitor		GDSC	0.51	2.8	sig-21055	LCL-161	LCL-161	Pro-apoptotic agent	BIRC2; XIAP	PRISM	0.48	-2.13
sig-20982	NECTROLIDE; SYNERGISIDIN; (+)-BREFELDIN A; DECUMBIN; CYANEIN; ASCOTOXIN	BREFELDIN A	Protein trafficking inhibitor; CRISPR/Cas9 activator	ARF1	CTRP	0.51	0.64	sig-20912	PEVONEDISTAT	PEVONEDISTAT	NAE inhibitor	NAE1	GDSC	0.45	-0.86	sig-20879	21,22-SECOCAMPTOTHECIN-21-OIC ACID LACTONE; CAMPTOTHECINE; (+)-CAMPTOTHECINE; 20(S)-CAMPTOTHECINE; (+)-CAMPTOTHECIN; D-CAMPTOTHECIN; (S)-(+)-CAMPTOTHECIN	CAMPTOTHECIN	Topoisomerase inhibitor; DNA replication inhibitor	TOP1	GDSC	0.5	2.8	sig-20982	NECTROLIDE; SYNERGISIDIN; (+)-BREFELDIN A; DECUMBIN; CYANEIN; ASCOTOXIN	BREFELDIN A	Protein trafficking inhibitor; CRISPR/Cas9 activator	ARF1	CTRP	0.51	-2.09
sig-21303	1-[(3R)-3-[4-AMINO-3-(4-PHENOXYPHENYL)-1H-PYRAZOLO[3,4-D]PYRIMIDIN-1-YL]PIPERIDIN-1-YL]PROP-2-EN-1-ONE; IBRUTINIB	IBRUTINIB	BTK inhibitor	BTK	CTRP	0.54	0.63	sig-21390	EXATECAN-MESYLATE	EXATECAN-MESYLATE	DNA replication inhibitor; Topoisomerase inhibitor	TOP1	PRISM	0.53	-0.85	sig-21390	EXATECAN-MESYLATE	EXATECAN-MESYLATE	DNA replication inhibitor; Topoisomerase inhibitor	TOP1	PRISM	0.53	2.76	sig-21303	1-[(3R)-3-[4-AMINO-3-(4-PHENOXYPHENYL)-1H-PYRAZOLO[3,4-D]PYRIMIDIN-1-YL]PIPERIDIN-1-YL]PROP-2-EN-1-ONE; IBRUTINIB	IBRUTINIB	BTK inhibitor	BTK	CTRP	0.54	-2.06
sig-21216	ALPELISIB	ALPELISIB	PI3K/AKT/mTOR signaling inhibitor	PIK3CA; PIK3CB; PIK3CD; PIK3CG	PRISM	0.51	0.6	sig-20937	BANG LAI; EPIDOPHYLLOTOXIN; 4'-DEMETHYLEPIPODOPHYLLOTOXIN 9-(4,6-O-(R)-2-THENYLIDENE-BETA-D-GLUCOPYRANOSIDE); TENIPOSIDE	TENIPOSIDE	Topoisomerase inhibitor	TOP2A; TOP2B	GDSC	0.44	-0.84	sig-20937	BANG LAI; EPIDOPHYLLOTOXIN; 4'-DEMETHYLEPIPODOPHYLLOTOXIN 9-(4,6-O-(R)-2-THENYLIDENE-BETA-D-GLUCOPYRANOSIDE); TENIPOSIDE	TENIPOSIDE	Topoisomerase inhibitor	TOP2A; TOP2B	GDSC	0.44	2.72	sig-21121	CNX-2006	CNX-2006	ErbB inhibitor	EGFR	PRISM	0.44	-1.96
sig-21121	CNX-2006	CNX-2006	ErbB inhibitor	EGFR	PRISM	0.44	0.6	sig-21054	TEMSIROLIMUS	TEMSIROLIMUS	PI3K/AKT/mTOR signaling inhibitor	MTOR	CTRP	0.43	-0.77	sig-21054	TEMSIROLIMUS	TEMSIROLIMUS	PI3K/AKT/mTOR signaling inhibitor	MTOR	CTRP	0.43	2.5	sig-21216	ALPELISIB	ALPELISIB	PI3K/AKT/mTOR signaling inhibitor	PIK3CA; PIK3CB; PIK3CD; PIK3CG	PRISM	0.51	-1.95
sig-21128	METATINIB	METATINIB	Protein fusion inhibitor	ABL1; BCR; BCR-ABL1	PRISM	0.56	0.57	sig-21408	GSK-J4	GSK-J4	Chromatin agent	KDM6A; KDM6B	CTRP	0.53	-0.74	sig-21408	GSK-J4	GSK-J4	Chromatin agent	KDM6A; KDM6B	CTRP	0.53	2.41	sig-21128	METATINIB	METATINIB	Protein fusion inhibitor	ABL1; BCR; BCR-ABL1	PRISM	0.56	-1.87
sig-21079	R428	R428	AXL inhibitor	AXL	CTRP	0.51	0.54	sig-20949	MERACTINOMYCIN; ACTD; ACTINOMYCIN C1; LYOVAC COSMEGEN; ACTINOMYCIN IV; 2-AMINO-N,N'-BIS(HEXADECAHYDRO-2,5,9-TRIMETHYL-6,13-BIS(1-METHYLETHYL)-1,4,7,11,14-PENTAOXO-1H-PYRROLO(2,1-I)(1,4,7,10,13)OXATETRA-AZACYCLOHEXADECIN-10-YL)-4,6-DIMETHYL-3-OXO-3H-PHENOXAZINE-1,9-DICARBOXAMIDE; DACTINOMYCIN; ACTINOMYCIN D	DACTINOMYCIN	Transcription inhibitor	RNApol	GDSC	0.47	-0.74	sig-20949	MERACTINOMYCIN; ACTD; ACTINOMYCIN C1; LYOVAC COSMEGEN; ACTINOMYCIN IV; 2-AMINO-N,N'-BIS(HEXADECAHYDRO-2,5,9-TRIMETHYL-6,13-BIS(1-METHYLETHYL)-1,4,7,11,14-PENTAOXO-1H-PYRROLO(2,1-I)(1,4,7,10,13)OXATETRA-AZACYCLOHEXADECIN-10-YL)-4,6-DIMETHYL-3-OXO-3H-PHENOXAZINE-1,9-DICARBOXAMIDE; DACTINOMYCIN; ACTINOMYCIN D	DACTINOMYCIN	Transcription inhibitor	RNApol	GDSC	0.47	2.41	sig-21079	R428	R428	AXL inhibitor	AXL	CTRP	0.51	-1.76
sig-21166	21,22-SECOCAMPTOTHECIN-21-OIC ACID LACTONE; CAMPTOTHECINE; (+)-CAMPTOTHECINE; 20(S)-CAMPTOTHECINE; (+)-CAMPTOTHECIN; D-CAMPTOTHECIN; (S)-(+)-CAMPTOTHECIN	CAMPTOTHECIN	Topoisomerase inhibitor; DNA replication inhibitor	TOP1	PRISM	0.51	0.53	sig-21277	DIPHENYLENEIODONIUM	DIPHENYLENEIODONIUM	ROS/RNS modulator; ROS/RNS inhibitor	NOS2; NOS3	PRISM	0.56	-0.73	sig-21277	DIPHENYLENEIODONIUM	DIPHENYLENEIODONIUM	ROS/RNS modulator; ROS/RNS inhibitor	NOS2; NOS3	PRISM	0.56	2.37	sig-21166	21,22-SECOCAMPTOTHECIN-21-OIC ACID LACTONE; CAMPTOTHECINE; (+)-CAMPTOTHECINE; 20(S)-CAMPTOTHECINE; (+)-CAMPTOTHECIN; D-CAMPTOTHECIN; (S)-(+)-CAMPTOTHECIN	CAMPTOTHECIN	Topoisomerase inhibitor; DNA replication inhibitor	TOP1	PRISM	0.51	-1.71
sig-21104	CEP-32496	CEP-32496	RAF inhibitor	BRAF; RAF1	PRISM	0.59	0.5	sig-20898	BIOTECAN; IRINOTECAN LACTONE; CAMPTO; (+)-IRINOTECAN; IRINOTECAN	IRINOTECAN	Topoisomerase inhibitor; DNA replication inhibitor	TOP1	GDSC	0.46	-0.72	sig-20898	BIOTECAN; IRINOTECAN LACTONE; CAMPTO; (+)-IRINOTECAN; IRINOTECAN	IRINOTECAN	Topoisomerase inhibitor; DNA replication inhibitor	TOP1	GDSC	0.46	2.35	sig-21101	TAMATINIB	TAMATINIB	SYK inhibitor	SYK	CTRP	0.57	-1.63
sig-21101	TAMATINIB	TAMATINIB	SYK inhibitor	SYK	CTRP	0.57	0.5	sig-20880	LEMBLASTINE; WEIBAODING; VINCALEUKOBLASTINE; ONCOSTIN; XINTOPROST; VINKO; VELBAN; VELBASTIN; VINBLASTINE; VINBLASIN; CYTOBLASTIN; VELBE; VINBLASTIN; BLASTIVIN	VINBLASTINE	Microtubule agent		GDSC	0.51	-0.71	sig-20880	LEMBLASTINE; WEIBAODING; VINCALEUKOBLASTINE; ONCOSTIN; XINTOPROST; VINKO; VELBAN; VELBASTIN; VINBLASTINE; VINBLASIN; CYTOBLASTIN; VELBE; VINBLASTIN; BLASTIVIN	VINBLASTINE	Microtubule agent		GDSC	0.51	2.31	sig-21104	CEP-32496	CEP-32496	RAF inhibitor	BRAF; RAF1	PRISM	0.59	-1.62
sig-21207	GDC-0941	GDC-0941	PI3K/AKT/mTOR signaling inhibitor	PIK3CA; PIK3CB; PIK3CD; PIK3CG	CTRP	0.57	0.49	sig-20884	SUBEROYLANILIDE HYDROXAMIC ACID; OCTANEDIOIC ACID HYDROXYAMIDE PHENYLAMIDE; VORINOSTAT; SHH; SUBERANILOHYDROXAMIC ACID; SAHA	VORINOSTAT	Chromatin agent	HDAC1; HDAC10; HDAC11; HDAC2; HDAC3; HDAC4; HDAC5; HDAC6; HDAC7; HDAC8; HDAC9	GDSC	0.47	-0.7	sig-20884	SUBEROYLANILIDE HYDROXAMIC ACID; OCTANEDIOIC ACID HYDROXYAMIDE PHENYLAMIDE; VORINOSTAT; SHH; SUBERANILOHYDROXAMIC ACID; SAHA	VORINOSTAT	Chromatin agent	HDAC1; HDAC10; HDAC11; HDAC2; HDAC3; HDAC4; HDAC5; HDAC6; HDAC7; HDAC8; HDAC9	GDSC	0.47	2.28	sig-21409	PLURIPOTIN	PLURIPOTIN	MAPK inhibitor	MAPK1; RASAL1	CTRP	0.52	-1.6
sig-21409	PLURIPOTIN	PLURIPOTIN	MAPK inhibitor	MAPK1; RASAL1	CTRP	0.52	0.49	sig-21287	PEVONEDISTAT	PEVONEDISTAT	NAE inhibitor	NAE1	CTRP	0.45	-0.66	sig-21287	PEVONEDISTAT	PEVONEDISTAT	NAE inhibitor	NAE1	CTRP	0.45	2.13	sig-21207	GDC-0941	GDC-0941	PI3K/AKT/mTOR signaling inhibitor	PIK3CA; PIK3CB; PIK3CD; PIK3CG	CTRP	0.57	-1.59
sig-21233	AZD-6482	AZD6482	PI3K/AKT/mTOR signaling inhibitor	PIK3CB; PIK3CD	CTRP	0.56	0.46	sig-21255	NEOPELTOLIDE	NEOPELTOLIDE	Cellular respiration inhibitor		CTRP	0.41	-0.66	sig-21255	NEOPELTOLIDE	NEOPELTOLIDE	Cellular respiration inhibitor		CTRP	0.41	2.13	sig-21233	AZD-6482	AZD6482	PI3K/AKT/mTOR signaling inhibitor	PIK3CB; PIK3CD	CTRP	0.56	-1.48
sig-21461	UNC0638:NAVITOCLAX (1:1 MOL/MOL)	UNC0638:NAVITOCLAX (1:1 MOL/MOL)	Combination drug; Chromatin agent; Pro-apoptotic agent	BCL2; BCL2L1; BCL2L2; EHMT1; EHMT2	CTRP	0.55	0.44	sig-21050	DANUSERTIB	DANUSERTIB	Cell cycle arrest; Aurora kinase inhibitor	AURKA; AURKB; AURKC; FGFR1; NTRK1; RET; SLK	PRISM	0.46	-0.64	sig-21050	DANUSERTIB	DANUSERTIB	Cell cycle arrest; Aurora kinase inhibitor	AURKA; AURKB; AURKC; FGFR1; NTRK1; RET; SLK	PRISM	0.46	2.09	sig-21461	UNC0638:NAVITOCLAX (1:1 MOL/MOL)	UNC0638:NAVITOCLAX (1:1 MOL/MOL)	Combination drug; Chromatin agent; Pro-apoptotic agent	BCL2; BCL2L1; BCL2L2; EHMT1; EHMT2	CTRP	0.55	-1.44
sig-21008	SANGIVAMYCIN	SANGIVAMYCIN	DNA replication inhibitor		PRISM	0.5	0.43	sig-20907	TALAZOPARIB	TALAZOPARIB	PARP inhibitor	PARP1; PARP2	GDSC	0.44	-0.63	sig-20907	TALAZOPARIB	TALAZOPARIB	PARP inhibitor	PARP1; PARP2	GDSC	0.44	2.04	sig-21008	SANGIVAMYCIN	SANGIVAMYCIN	DNA replication inhibitor		PRISM	0.5	-1.4
sig-21313	CH-55	CH-55	Retinoid acid receptor agonist	RARA; RARB; RARG	CTRP	0.49	0.41	sig-21219	RIGOSERTIB	RIGOSERTIB	PI3K/AKT/mTOR signaling inhibitor; Cell cycle arrest; PLK inhibitor	PIK3CA; PIK3CB; PLK1	PRISM	0.55	-0.62	sig-21219	RIGOSERTIB	RIGOSERTIB	PI3K/AKT/mTOR signaling inhibitor; Cell cycle arrest; PLK inhibitor	PIK3CA; PIK3CB; PLK1	PRISM	0.55	2.01	sig-21313	CH-55	CH-55	Retinoid acid receptor agonist	RARA; RARB; RARG	CTRP	0.49	-1.34
sig-21195	1-HYDROXYCHOLECALCIFEROL; 1螒-HYDROXYVITAMIN D3; 9,10-SECOCHOLESTA-5,7,10(19)-TRIENE-1螒,3螔-DIOL; ALFACALCIDOL; 1ALPHA-HYDROXYCHOLECALCIFEROL; 1螒-HYDROXY-VITAMIN D3; (5Z,7E)-9,10-SECO-5,7,10(19)-CHOLESTATRIEN-1螒,3螔-DIOL; ALSIODOL; ONE ALPHA; 1螒-HYDROXYCHOLECALCIFEROL	ALFACALCIDOL	Vitamin D receptor agonist	CYP27B1; VDR	PRISM	0.49	0.4	sig-21111	GDC-0980	GDC-0980	PI3K/AKT/mTOR signaling inhibitor	FGR; MAP3K9; MTOR; PIK3CA; PIK3CB; PIK3CD; PIK3CG; SYK	PRISM	0.52	-0.61	sig-21111	GDC-0980	GDC-0980	PI3K/AKT/mTOR signaling inhibitor	FGR; MAP3K9; MTOR; PIK3CA; PIK3CB; PIK3CD; PIK3CG; SYK	PRISM	0.52	1.97	sig-21195	1-HYDROXYCHOLECALCIFEROL; 1螒-HYDROXYVITAMIN D3; 9,10-SECOCHOLESTA-5,7,10(19)-TRIENE-1螒,3螔-DIOL; ALFACALCIDOL; 1ALPHA-HYDROXYCHOLECALCIFEROL; 1螒-HYDROXY-VITAMIN D3; (5Z,7E)-9,10-SECO-5,7,10(19)-CHOLESTATRIEN-1螒,3螔-DIOL; ALSIODOL; ONE ALPHA; 1螒-HYDROXYCHOLECALCIFEROL	ALFACALCIDOL	Vitamin D receptor agonist	CYP27B1; VDR	PRISM	0.49	-1.31
sig-21119	ETHACRIDINE-LACTATE-MONOHYDRATE	ETHACRIDINE-LACTATE-MONOHYDRATE	DNA replication inhibitor; DNA damaging agent		PRISM	0.44	0.4	sig-21026	BRD-K01737880	BRD-K01737880			CTRP	0.55	-0.58	sig-21375	TALTOBULIN	TALTOBULIN	Microtubule agent		PRISM	0.47	1.89	sig-21119	ETHACRIDINE-LACTATE-MONOHYDRATE	ETHACRIDINE-LACTATE-MONOHYDRATE	DNA replication inhibitor; DNA damaging agent		PRISM	0.44	-1.29
sig-21457	SELUMETINIB:PIPERLONGUMINE (8:1 MOL/MOL)	SELUMETINIB:PIPERLONGUMINE (8:1 MOL/MOL)	ROS/RNS modulator; MAPK inhibitor; Combination drug	MAP2K1; MAP2K2	CTRP	0.54	0.37	sig-21375	TALTOBULIN	TALTOBULIN	Microtubule agent		PRISM	0.47	-0.58	sig-21026	BRD-K01737880	BRD-K01737880			CTRP	0.55	1.88	sig-21116	ETP-46464	ETP-46464	DNA damage response inhibitor	ATM; ATR	CTRP	0.49	-1.21
sig-21116	ETP-46464	ETP-46464	DNA damage response inhibitor	ATM; ATR	CTRP	0.49	0.37	sig-20936	9-[(DIMETHYLAMINO)METHYL]-10-HYDROXY-(4S)-CAMPTOTHECIN; TOPOTECAN	TOPOTECAN	DNA replication inhibitor; Topoisomerase inhibitor; DNA damaging agent	TOP1	GDSC	0.47	-0.57	sig-20911	EPIRUBICIN; EPIRUBICIN EBEWE; 4'-EPIADRIAMYCIN; EPIADRIAMYCIN; PHARMORUBICIN	EPIRUBICIN	Topoisomerase inhibitor; DNA replication inhibitor; DNA damaging agent	CHD1; TOP2A	GDSC	0.45	1.86	sig-21457	SELUMETINIB:PIPERLONGUMINE (8:1 MOL/MOL)	SELUMETINIB:PIPERLONGUMINE (8:1 MOL/MOL)	ROS/RNS modulator; MAPK inhibitor; Combination drug	MAP2K1; MAP2K2	CTRP	0.54	-1.2
sig-21436	NAVITOCLAX:BIRINAPANT (1:1 MOL/MOL)	NAVITOCLAX:BIRINAPANT (1:1 MOL/MOL)	Combination drug; Pro-apoptotic agent	BCL2; BCL2L1; BCL2L2; DIABLO; XIAP	CTRP	0.45	0.37	sig-20911	EPIRUBICIN; EPIRUBICIN EBEWE; 4'-EPIADRIAMYCIN; EPIADRIAMYCIN; PHARMORUBICIN	EPIRUBICIN	Topoisomerase inhibitor; DNA replication inhibitor; DNA damaging agent	CHD1; TOP2A	GDSC	0.45	-0.57	sig-20936	9-[(DIMETHYLAMINO)METHYL]-10-HYDROXY-(4S)-CAMPTOTHECIN; TOPOTECAN	TOPOTECAN	DNA replication inhibitor; Topoisomerase inhibitor; DNA damaging agent	TOP1	GDSC	0.47	1.85	sig-21436	NAVITOCLAX:BIRINAPANT (1:1 MOL/MOL)	NAVITOCLAX:BIRINAPANT (1:1 MOL/MOL)	Combination drug; Pro-apoptotic agent	BCL2; BCL2L1; BCL2L2; DIABLO; XIAP	CTRP	0.45	-1.2
sig-21251	DEFOROLIMUS; RIDAFOROLIMUS	DEFOROLIMUS	PI3K/AKT/mTOR signaling inhibitor	MTOR	PRISM	0.56	0.36	sig-21061	SALAZOPYRIN EN-TABS; SALICYLAZOSULFAPYRIDINE; REUMAZIN; WEILIUFEN; 2-HYDROXY-5-[4-(PYRIDIN-2-YLSULFAMOYL)-PHENYLAZO]-BENZOIC ACID; SALAZOPYRIN EN; EMINAPYRIN; AZOPYRIN; ASASURFAN; 4-(PYRIDYL-2-AMIDOSULFONYL)-3'-CARBOXY-4'-HYDROXYAZOBENZENE; LAZAFIN; SALAZOPRIN; SULFASALAZINE; 5-(4-(2-PYRIDYLSULFAMOYL)PHENYLAZO)-2-HYDROXYBENZOIC ACID; SALASOPYRINE; FLOGOSTOP; DISALAZIN; SULCOLON; IWATA; SAAZ; 5-((…	SULFASALAZINE	Cyclooxygenase inhibitor	ACAT1; ALOX5; CHUK; IKBKB; PLA2G1B; PPARG; PTGS1; PTGS2; SLC46A1; SLC7A11; TBXAS1	PRISM	0.56	-0.56	sig-21061	SALAZOPYRIN EN-TABS; SALICYLAZOSULFAPYRIDINE; REUMAZIN; WEILIUFEN; 2-HYDROXY-5-[4-(PYRIDIN-2-YLSULFAMOYL)-PHENYLAZO]-BENZOIC ACID; SALAZOPYRIN EN; EMINAPYRIN; AZOPYRIN; ASASURFAN; 4-(PYRIDYL-2-AMIDOSULFONYL)-3'-CARBOXY-4'-HYDROXYAZOBENZENE; LAZAFIN; SALAZOPRIN; SULFASALAZINE; 5-(4-(2-PYRIDYLSULFAMOYL)PHENYLAZO)-2-HYDROXYBENZOIC ACID; SALASOPYRINE; FLOGOSTOP; DISALAZIN; SULCOLON; IWATA; SAAZ; 5-((…	SULFASALAZINE	Cyclooxygenase inhibitor	ACAT1; ALOX5; CHUK; IKBKB; PLA2G1B; PPARG; PTGS1; PTGS2; SLC46A1; SLC7A11; TBXAS1	PRISM	0.56	1.81	sig-21321	PAZOPANIB	PAZOPANIB	FLT3 inhibitor; Multi-kinase inhibitor; PDGFR inhibitor; KIT inhibitor; VEGFR inhibitor	CSF1R; FGF1; FGFR1; FGFR3; FLT1; FLT3; FLT4; ITK; KDR; KIT; PDGFRA; PDGFRB; SH2B3	PRISM	0.56	-1.18
sig-21321	PAZOPANIB	PAZOPANIB	FLT3 inhibitor; Multi-kinase inhibitor; PDGFR inhibitor; KIT inhibitor; VEGFR inhibitor	CSF1R; FGF1; FGFR1; FGFR3; FLT1; FLT3; FLT4; ITK; KDR; KIT; PDGFRA; PDGFRB; SH2B3	PRISM	0.56	0.36	sig-21244	PHA-848125	PHA-848125	Cell cycle arrest; CDK inhibitor	CDK2; CDK4; CDK7; NTRK1	PRISM	0.52	-0.55	sig-21244	PHA-848125	PHA-848125	Cell cycle arrest; CDK inhibitor	CDK2; CDK4; CDK7; NTRK1	PRISM	0.52	1.8	sig-21432	SELUMETINIB:MK-2206 (8:1 MOL/MOL)	SELUMETINIB:MK-2206 (8:1 MOL/MOL)	Combination drug; MAPK inhibitor; PI3K/AKT/mTOR signaling inhibitor	AKT1; MAP2K1; MAP2K2	CTRP	0.54	-1.18
sig-21432	SELUMETINIB:MK-2206 (8:1 MOL/MOL)	SELUMETINIB:MK-2206 (8:1 MOL/MOL)	Combination drug; MAPK inhibitor; PI3K/AKT/mTOR signaling inhibitor	AKT1; MAP2K1; MAP2K2	CTRP	0.54	0.36	sig-21354	1-N'-BENZENECARBOTHIOYL-3-(2-BENZENECARBOTHIOYL-2-METHYLHYDRAZINYL)-N'-METHYL-OXOPROPANEHYDRAZIDIDE; ELESCLOMOL	ELESCLOMOL	ROS/RNS inducer; ROS/RNS modulator	HSPA1A	PRISM	0.57	-0.54	sig-21354	1-N'-BENZENECARBOTHIOYL-3-(2-BENZENECARBOTHIOYL-2-METHYLHYDRAZINYL)-N'-METHYL-OXOPROPANEHYDRAZIDIDE; ELESCLOMOL	ELESCLOMOL	ROS/RNS inducer; ROS/RNS modulator	HSPA1A	PRISM	0.57	1.77	sig-21251	DEFOROLIMUS; RIDAFOROLIMUS	DEFOROLIMUS	PI3K/AKT/mTOR signaling inhibitor	MTOR	PRISM	0.56	-1.17
sig-21431	TRETINOIN:CARBOPLATIN (2:1 MOL/MOL)	TRETINOIN:CARBOPLATIN (2:1 MOL/MOL)	Combination drug; Retinoid acid receptor agonist; DNA replication inhibitor	RARA; RARB; RARG	CTRP	0.53	0.36	sig-21265	BARASERTIB-HQPA	BARASERTIB-HQPA	Cell cycle arrest; Aurora kinase inhibitor	AURKB	PRISM	0.41	-0.54	sig-21265	BARASERTIB-HQPA	BARASERTIB-HQPA	Cell cycle arrest; Aurora kinase inhibitor	AURKB	PRISM	0.41	1.76	sig-21431	TRETINOIN:CARBOPLATIN (2:1 MOL/MOL)	TRETINOIN:CARBOPLATIN (2:1 MOL/MOL)	Combination drug; Retinoid acid receptor agonist; DNA replication inhibitor	RARA; RARB; RARG	CTRP	0.53	-1.16
sig-21146	TIVANTINIB	TIVANTINIB	MET inhibitor	MET	CTRP	0.51	0.36	sig-21284	CYCLOCYTIDINE	CYCLOCYTIDINE	DNA replication inhibitor; Transcription inhibitor		PRISM	0.48	-0.52	sig-21284	CYCLOCYTIDINE	CYCLOCYTIDINE	DNA replication inhibitor; Transcription inhibitor		PRISM	0.48	1.69	sig-21146	TIVANTINIB	TIVANTINIB	MET inhibitor	MET	CTRP	0.51	-1.16
sig-21193	DASATINIB ANHYDROUS; DASATINIB (ANH.); DASATINIB; BMS DASATINIB; ANHYDROUS DASATINIB; ANH. DASATINIB; N-(2-CHLORO-6-METHYLPHENYL)-2-({6-[4-(2-HYDROXYETHYL)PIPERAZIN-1-YL]-2-METHYLPYRIMIDIN-4-YL}AMINO)-1,3-THIAZOLE-5-CARBOXAMIDE; DASATINIB (ANHYDROUS)	DASATINIB	Multi-kinase inhibitor; SRC inhibitor; EPH receptor inhibitor; KIT inhibitor; Fusion protein inhibitor; PDGFR inhibitor	ABL; ABL1; ABL2; BCR-ABL1; BLK; EPHA2; FGR; FRK; FYN; HCK; KIT; LCK; LYN; PDGFR; PDGFRB; SRC; SRMS; STAT5B; YES1	CTRP	0.56	0.35	sig-20940	ALCRIST; 22-OXOVINCALEUKOBLASTIN; TEVACRISTIN; ONCOCRISTIN; VINCES; ALCAVIXIN; VINCRISTINE; ONCOVIN; VINRACINE; VINCRISIN; 22-OXOVINCALEUKOBLASTINE; ONCRIVIN; VINLON; CYTOCRISTIN; VINCRISTIN; VINCRISUL; SINDOVIN; LEUROCRISTINE; CITOMID	VINCRISTINE	Microtubule agent	TUBA4A; TUBB	GDSC	0.46	-0.51	sig-20940	ALCRIST; 22-OXOVINCALEUKOBLASTIN; TEVACRISTIN; ONCOCRISTIN; VINCES; ALCAVIXIN; VINCRISTINE; ONCOVIN; VINRACINE; VINCRISIN; 22-OXOVINCALEUKOBLASTINE; ONCRIVIN; VINLON; CYTOCRISTIN; VINCRISTIN; VINCRISUL; SINDOVIN; LEUROCRISTINE; CITOMID	VINCRISTINE	Microtubule agent	TUBA4A; TUBB	GDSC	0.46	1.65	sig-21193	DASATINIB ANHYDROUS; DASATINIB (ANH.); DASATINIB; BMS DASATINIB; ANHYDROUS DASATINIB; ANH. DASATINIB; N-(2-CHLORO-6-METHYLPHENYL)-2-({6-[4-(2-HYDROXYETHYL)PIPERAZIN-1-YL]-2-METHYLPYRIMIDIN-4-YL}AMINO)-1,3-THIAZOLE-5-CARBOXAMIDE; DASATINIB (ANHYDROUS)	DASATINIB	Multi-kinase inhibitor; SRC inhibitor; EPH receptor inhibitor; KIT inhibitor; Fusion protein inhibitor; PDGFR inhibitor	ABL; ABL1; ABL2; BCR-ABL1; BLK; EPHA2; FGR; FRK; FYN; HCK; KIT; LCK; LYN; PDGFR; PDGFRB; SRC; SRMS; STAT5B; YES1	CTRP	0.56	-1.14
sig-21182	7-HYDROXYSTAUROSPORINE	7-HYDROXYSTAUROSPORINE	Cell cycle arrest; CDK inhibitor; Cell cycle checkpoint inhibitor; PKC inhibitor	CHEK1; MARK3; PDPK1	PRISM	0.55	0.35	sig-20918	N-(2-AMINOPHENYL)-4-(N-(PYRIDIN-3-YLMETHOXYCARBONYL)AMINOMETHYL)BENZAMIDE; N-[[4-[(2-AMINOANILINO)-OXOMETHYL]PHENYL]METHYL]CARBAMIC ACID 3-PYRIDINYLMETHYL ESTER; ENTINOSTAT	ENTINOSTAT	Chromatin agent	HDAC1; HDAC2; HDAC3; HDAC6; HDAC8	GDSC	0.52	-0.5	sig-21424	TANESPIMYCIN:BORTEZOMIB (250:1 MOL/MOL)	TANESPIMYCIN:BORTEZOMIB (250:1 MOL/MOL)	Combination drug; HSP inhibitor; Ubiquitin-proteasome system inhibitor	HSP90AA1; PSMB1; PSMB2; PSMB5; PSMD1; PSMD2	CTRP	0.51	1.63	sig-21147	DFBA; DIFLUPREDNATE; DIFLUOROPREDNISOLONE BUTYRATE ACETATE	DIFLUPREDNATE	Glucocorticoid receptor agonist	NR3C1	PRISM	0.52	-1.14
sig-21147	DFBA; DIFLUPREDNATE; DIFLUOROPREDNISOLONE BUTYRATE ACETATE	DIFLUPREDNATE	Glucocorticoid receptor agonist	NR3C1	PRISM	0.52	0.35	sig-21424	TANESPIMYCIN:BORTEZOMIB (250:1 MOL/MOL)	TANESPIMYCIN:BORTEZOMIB (250:1 MOL/MOL)	Combination drug; HSP inhibitor; Ubiquitin-proteasome system inhibitor	HSP90AA1; PSMB1; PSMB2; PSMB5; PSMD1; PSMD2	CTRP	0.51	-0.5	sig-20918	N-(2-AMINOPHENYL)-4-(N-(PYRIDIN-3-YLMETHOXYCARBONYL)AMINOMETHYL)BENZAMIDE; N-[[4-[(2-AMINOANILINO)-OXOMETHYL]PHENYL]METHYL]CARBAMIC ACID 3-PYRIDINYLMETHYL ESTER; ENTINOSTAT	ENTINOSTAT	Chromatin agent	HDAC1; HDAC2; HDAC3; HDAC6; HDAC8	GDSC	0.52	1.62	sig-21197	NVP-TAE684	NVP-TAE684	Fusion protein inhibitor; ALK inhibitor	ALK; NPM-ALK	CTRP	0.51	-1.14
sig-21197	NVP-TAE684	NVP-TAE684	Fusion protein inhibitor; ALK inhibitor	ALK; NPM-ALK	CTRP	0.51	0.35	sig-21273	PHA-793887	PHA-793887	Cell cycle arrest; CDK inhibitor	CDK1; CDK2; CDK4; CDK5; CDK7; CDK9	PRISM	0.55	-0.49	sig-21273	PHA-793887	PHA-793887	Cell cycle arrest; CDK inhibitor	CDK1; CDK2; CDK4; CDK5; CDK7; CDK9	PRISM	0.55	1.6	sig-21182	7-HYDROXYSTAUROSPORINE	7-HYDROXYSTAUROSPORINE	Cell cycle arrest; CDK inhibitor; Cell cycle checkpoint inhibitor; PKC inhibitor	CHEK1; MARK3; PDPK1	PRISM	0.55	-1.12
sig-21096	LY2801653	LY2801653	MET inhibitor	MET	PRISM	0.55	0.34	sig-21022	RITA	RITA	p53 activator/MDM2 inhibitor	MDM2; TP53	CTRP	0.54	-0.49	sig-21291	EVP4593	EVP4593	NFkB signaling inhibitor		PRISM	0.44	1.6	sig-21092	PD-168393	PD-168393	ErbB inhibitor	EGFR; ERBB2; SRC	PRISM	0.54	-1.12
sig-21215	BYL-719	BYL-719	PI3K/AKT/mTOR signaling inhibitor	PIK3CA	CTRP	0.54	0.34	sig-21291	EVP4593	EVP4593	NFkB signaling inhibitor		PRISM	0.44	-0.49	sig-21022	RITA	RITA	p53 activator/MDM2 inhibitor	MDM2; TP53	CTRP	0.54	1.59	sig-21096	LY2801653	LY2801653	MET inhibitor	MET	PRISM	0.55	-1.11
sig-21092	PD-168393	PD-168393	ErbB inhibitor	EGFR; ERBB2; SRC	PRISM	0.54	0.34	sig-21020	BRD-A94377914	BRD-A94377914	Chromatin agent	HDAC1; HDAC2; HDAC3; HDAC6; HDAC8	CTRP	0.51	-0.48	sig-21020	BRD-A94377914	BRD-A94377914	Chromatin agent	HDAC1; HDAC2; HDAC3; HDAC6; HDAC8	CTRP	0.51	1.55	sig-21215	BYL-719	BYL-719	PI3K/AKT/mTOR signaling inhibitor	PIK3CA	CTRP	0.54	-1.1
sig-21174	N-(2-{[2-(DIMETHYLAMINO)ETHYL](METHYL)AMINO}-4-METHOXY-5-{[4-(1-METHYL-1H-INDOL-3-YL)PYRIMIDIN-2-YL]AMINO}PHENYL)PROP-2-ENAMIDE; OSIMERTINIB; MERELETINIB	OSIMERTINIB	ErbB inhibitor	EGFR	PRISM	0.57	0.33	sig-20954	TELOMERASE INHIBITOR IX	TELOMERASE INHIBITOR IX	Telomerase inhibitor	Telomerase	GDSC	0.57	-0.47	sig-20954	TELOMERASE INHIBITOR IX	TELOMERASE INHIBITOR IX	Telomerase inhibitor	Telomerase	GDSC	0.57	1.54	sig-21174	N-(2-{[2-(DIMETHYLAMINO)ETHYL](METHYL)AMINO}-4-METHOXY-5-{[4-(1-METHYL-1H-INDOL-3-YL)PYRIMIDIN-2-YL]AMINO}PHENYL)PROP-2-ENAMIDE; OSIMERTINIB; MERELETINIB	OSIMERTINIB	ErbB inhibitor	EGFR	PRISM	0.57	-1.08
sig-21400	INGENOL 3-ANGELATE; 3-INGENYL ANGELATE; PICATO GEL; INGENOL MEBUTATE; 3-ANGELOYLINGENOL	INGENOL-MEBUTATE	PKC activator	PRKCA; PRKCB; PRKCD; PRKCE; PRKCG	PRISM	0.55	0.33	sig-21241	BESTATIN; UBENIMEX	UBENIMEX	Leukotriene synthesis inhibitor; Proteolysis inhibitor	LTA4H; RNPEP	PRISM	0.44	-0.47	sig-21241	BESTATIN; UBENIMEX	UBENIMEX	Leukotriene synthesis inhibitor; Proteolysis inhibitor	LTA4H; RNPEP	PRISM	0.44	1.53	sig-21226	SELUMETINIB	SELUMETINIB	MAPK inhibitor	MAP2K1; MAP2K2; MEK1; MEK2	PRISM	0.52	-1.08
sig-21226	SELUMETINIB	SELUMETINIB	MAPK inhibitor	MAP2K1; MAP2K2; MEK1; MEK2	PRISM	0.52	0.33	sig-21347	TANESPIMYCIN; 17AAG	TANESPIMYCIN	HSP inhibitor	HSP90AA1	PRISM	0.53	-0.46	sig-21347	TANESPIMYCIN; 17AAG	TANESPIMYCIN	HSP inhibitor	HSP90AA1	PRISM	0.53	1.5	sig-21400	INGENOL 3-ANGELATE; 3-INGENYL ANGELATE; PICATO GEL; INGENOL MEBUTATE; 3-ANGELOYLINGENOL	INGENOL-MEBUTATE	PKC activator	PRKCA; PRKCB; PRKCD; PRKCE; PRKCG	PRISM	0.55	-1.07
sig-21434	SELUMETINIB:NAVITOCLAX (8:1 MOL/MOL)	SELUMETINIB:NAVITOCLAX (8:1 MOL/MOL)	Combination drug; MAPK inhibitor; Pro-apoptotic agent	BCL2; BCL2L1; BCL2L2; MAP2K1; MAP2K2	CTRP	0.48	0.33	sig-21000	HYPOESTOXIDE	HYPOESTOXIDE	NFkB signaling inhibitor	IKBKB; IL1B; TNF	PRISM	0.51	-0.46	sig-21000	HYPOESTOXIDE	HYPOESTOXIDE	NFkB signaling inhibitor	IKBKB; IL1B; TNF	PRISM	0.51	1.5	sig-21434	SELUMETINIB:NAVITOCLAX (8:1 MOL/MOL)	SELUMETINIB:NAVITOCLAX (8:1 MOL/MOL)	Combination drug; MAPK inhibitor; Pro-apoptotic agent	BCL2; BCL2L1; BCL2L2; MAP2K1; MAP2K2	CTRP	0.48	-1.07
sig-21072	TG-101348	TG-101348	JAK-STAT signaling inhibitor	JAK2	CTRP	0.5	0.32	sig-21407	BECLOVENT; 9-CHLORO-11螔-HYDROXY-16螔-METHYLPREGNA-1,4-DIENE-3,20-DIONE 17,21-DIPROPIONATE; (11螔,16螔)-9-CHLORO-11-HYDROXY-16-METHYL-17,21-BIS(1-OXOPROPOXY)PREGNA-1,4-DIENE-3,20-DIONE; ANCERON; CLENIL-A; BECLOMET; ANDION; BECLACIN; AEROBEC; BECLOMETASONE DIPROPIONATE; KORBUTONE; SANASTHMYL; RIVANASE; ALDECIN; VANCERIL; BECLOFORTE; BECLOMETHASONE DIPROPIONATE; BECONASOL; INALONE; RINO-CLENIL; BECODIS…	BECLOMETHASONE-DIPROPIONATE	Glucocorticoid receptor agonist	GPR97; NR3C1	PRISM	0.53	-0.45	sig-21407	BECLOVENT; 9-CHLORO-11螔-HYDROXY-16螔-METHYLPREGNA-1,4-DIENE-3,20-DIONE 17,21-DIPROPIONATE; (11螔,16螔)-9-CHLORO-11-HYDROXY-16-METHYL-17,21-BIS(1-OXOPROPOXY)PREGNA-1,4-DIENE-3,20-DIONE; ANCERON; CLENIL-A; BECLOMET; ANDION; BECLACIN; AEROBEC; BECLOMETASONE DIPROPIONATE; KORBUTONE; SANASTHMYL; RIVANASE; ALDECIN; VANCERIL; BECLOFORTE; BECLOMETHASONE DIPROPIONATE; BECONASOL; INALONE; RINO-CLENIL; BECODIS…	BECLOMETHASONE-DIPROPIONATE	Glucocorticoid receptor agonist	GPR97; NR3C1	PRISM	0.53	1.45	sig-21071	TRAMETINIB	TRAMETINIB	MAPK inhibitor	MAP2K1; MAP2K2; MEK1; MEK2	PRISM	0.5	-1.05
sig-21071	TRAMETINIB	TRAMETINIB	MAPK inhibitor	MAP2K1; MAP2K2; MEK1; MEK2	PRISM	0.5	0.32	sig-21406	BRD-K97651142	BRD-K97651142	Aphrocallistin derivative		CTRP	0.44	-0.44	sig-21406	BRD-K97651142	BRD-K97651142	Aphrocallistin derivative		CTRP	0.44	1.42	sig-21047	AM-580	AM-580	Retinoid acid receptor agonist	RARA	CTRP	0.49	-1.04
sig-21047	AM-580	AM-580	Retinoid acid receptor agonist	RARA	CTRP	0.49	0.32	sig-21052	GSK525762A	GSK525762A	BET inhibitor	BRD2; BRD3; BRD4	CTRP	0.54	-0.43	sig-21052	GSK525762A	GSK525762A	BET inhibitor	BRD2; BRD3; BRD4	CTRP	0.54	1.41	sig-21072	TG-101348	TG-101348	JAK-STAT signaling inhibitor	JAK2	CTRP	0.5	-1.03
sig-21339	IXAZOMIB; NINLARO	IXAZOMIB	Ubiquitin-proteasome system inhibitor		PRISM	0.46	0.32	sig-20985	BANG LAI; EPIDOPHYLLOTOXIN; 4'-DEMETHYLEPIPODOPHYLLOTOXIN 9-(4,6-O-(R)-2-THENYLIDENE-BETA-D-GLUCOPYRANOSIDE); TENIPOSIDE	TENIPOSIDE	Topoisomerase inhibitor	TOP2A; TOP2B	PRISM	0.47	-0.43	sig-20985	BANG LAI; EPIDOPHYLLOTOXIN; 4'-DEMETHYLEPIPODOPHYLLOTOXIN 9-(4,6-O-(R)-2-THENYLIDENE-BETA-D-GLUCOPYRANOSIDE); TENIPOSIDE	TENIPOSIDE	Topoisomerase inhibitor	TOP2A; TOP2B	PRISM	0.47	1.41	sig-21339	IXAZOMIB; NINLARO	IXAZOMIB	Ubiquitin-proteasome system inhibitor		PRISM	0.46	-1.02
								sig-20943	DIHYDROROTENONE	DIHYDROROTENONE	Mitochondrial inhibitor		GDSC	0.46	-0.43	sig-20943	DIHYDROROTENONE	DIHYDROROTENONE	Mitochondrial inhibitor		GDSC	0.46	1.4
								sig-21414	GENZ-644282	GENZ-644282	DNA replication inhibitor; Topoisomerase inhibitor	TOP1	PRISM	0.44	-0.43	sig-21414	MLN2238	MLN2238	Ubiquitin-proteasome system inhibitor	PSMB5	CTRP	0.49	1.38
								sig-21019	FQI-1	FQI-1	LSF1-mediated transcription inhibitor		CTRP	0.55	-0.42	sig-21338	GENZ-644282	GENZ-644282	DNA replication inhibitor; Topoisomerase inhibitor	TOP1	PRISM	0.44	1.38
								sig-21426	OXALATOPLATIN; OXALIPLATIN; DIAMINOCYCLOHEXANE OXALATOPLATINUM; OXALATOPLATINUM; L-OHP	OXALIPLATIN	DNA replication inhibitor; DNA damaging agent		CTRP	0.53	-0.42	sig-21019	FQI-1	FQI-1	LSF1-mediated transcription inhibitor		CTRP	0.55	1.37
								sig-21338	MLN2238	MLN2238	Ubiquitin-proteasome system inhibitor	PSMB5	CTRP	0.49	-0.42	sig-21426	OXALATOPLATIN; OXALIPLATIN; DIAMINOCYCLOHEXANE OXALATOPLATINUM; OXALATOPLATINUM; L-OHP	OXALIPLATIN	DNA replication inhibitor; DNA damaging agent		CTRP	0.53	1.37
								sig-20958	VINELBINE; VINORGEN; NAVIREL; FILCRIN; VILNE; 5'-NORANHYDROVINBLASTINE; NAVILDEZ; NAVELBIN; BENDARELBIN; VINOTEL; VINOREL; VINORAYNE; NEOCITEC; ZINAVIN; RENOVEL; EBERELBIN; VINORELBINE; EUROVINORELBIN; RIBORELBIN; NAVIN; EUNEXON	VINORELBINE	Microtubule agent	TUBA1A; TUBA1B; TUBA1C; TUBA3C; TUBA3D; TUBA3E; TUBA4A; TUBB; TUBB1; TUBB2A; TUBB2B; TUBB3; TUBB4A; TUBB4B; TUBB6; TUBB8	GDSC	0.45	-0.41	sig-20958	VINELBINE; VINORGEN; NAVIREL; FILCRIN; VILNE; 5'-NORANHYDROVINBLASTINE; NAVILDEZ; NAVELBIN; BENDARELBIN; VINOTEL; VINOREL; VINORAYNE; NEOCITEC; ZINAVIN; RENOVEL; EBERELBIN; VINORELBINE; EUROVINORELBIN; RIBORELBIN; NAVIN; EUNEXON	VINORELBINE	Microtubule agent	TUBA1A; TUBA1B; TUBA1C; TUBA3C; TUBA3D; TUBA3E; TUBA4A; TUBB; TUBB1; TUBB2A; TUBB2B; TUBB3; TUBB4A; TUBB4B; TUBB6; TUBB8	GDSC	0.45	1.35

## Sheet: sTable9
non-lumimal-mCAFs high sensitive drugs								non-lumimal-mCAFs low sensitive drugs								non-lumimal-icaf high sensitive drugs								non-lumimal-icaf low sensitive drugs
ID	drugs	preferred.drug.names	MoAs	targets	studies	switch.point	residuals.mean	ID	drugs	preferred.drug.names	MoAs	targets	studies	switch.point	residuals.mean	ID	drugs	preferred.drug.names	MoAs	targets	studies	switch.point	residuals.mean	ID	drugs	preferred.drug.names	MoAs	targets	studies	switch.point	residuals.mean
sig-21105	SKI-II	SKI-II	Lipid metabolism inhibitor; Sphingolipid metabolism inhibitor	SPHK1	PRISM	0.5	1.52	sig-21097	MUBRITINIB	MUBRITINIB	ErbB inhibitor	EGFR; ERBB2	PRISM	0.42	-1.45	sig-21097	MUBRITINIB	MUBRITINIB	ErbB inhibitor	EGFR; ERBB2	PRISM	0.42	2.83	sig-21105	SKI-II	SKI-II	Lipid metabolism inhibitor; Sphingolipid metabolism inhibitor	SPHK1	PRISM	0.5	-2.97
sig-20888	STAUROSPORINE	STAUROSPORINE	Multi-kinase inhibitor		GDSC	0.58	1.49	sig-21354	1-N'-BENZENECARBOTHIOYL-3-(2-BENZENECARBOTHIOYL-2-METHYLHYDRAZINYL)-N'-METHYL-OXOPROPANEHYDRAZIDIDE; ELESCLOMOL	ELESCLOMOL	ROS/RNS inducer; ROS/RNS modulator	HSPA1A	PRISM	0.54	-1.2	sig-21354	1-N'-BENZENECARBOTHIOYL-3-(2-BENZENECARBOTHIOYL-2-METHYLHYDRAZINYL)-N'-METHYL-OXOPROPANEHYDRAZIDIDE; ELESCLOMOL	ELESCLOMOL	ROS/RNS inducer; ROS/RNS modulator	HSPA1A	PRISM	0.54	2.35	sig-20888	STAUROSPORINE	STAUROSPORINE	Multi-kinase inhibitor		GDSC	0.58	-2.91
sig-21121	CNX-2006	CNX-2006	ErbB inhibitor	EGFR	PRISM	0.46	1.12	sig-21273	PHA-793887	PHA-793887	Cell cycle arrest; CDK inhibitor	CDK1; CDK2; CDK4; CDK5; CDK7; CDK9	PRISM	0.47	-1.08	sig-21273	PHA-793887	PHA-793887	Cell cycle arrest; CDK inhibitor	CDK1; CDK2; CDK4; CDK5; CDK7; CDK9	PRISM	0.47	2.11	sig-21121	CNX-2006	CNX-2006	ErbB inhibitor	EGFR	PRISM	0.46	-2.2
sig-21289	MK-2206	MK-2206	PI3K/AKT/mTOR signaling inhibitor	AKT1; AKT2	CTRP	0.54	1.02	sig-21277	DIPHENYLENEIODONIUM	DIPHENYLENEIODONIUM	ROS/RNS modulator; ROS/RNS inhibitor	NOS2; NOS3	PRISM	0.54	-1.05	sig-21277	DIPHENYLENEIODONIUM	DIPHENYLENEIODONIUM	ROS/RNS modulator; ROS/RNS inhibitor	NOS2; NOS3	PRISM	0.54	2.06	sig-21289	MK-2206	MK-2206	PI3K/AKT/mTOR signaling inhibitor	AKT1; AKT2	CTRP	0.54	-1.99
sig-20896	DASATINIB ANHYDROUS; DASATINIB (ANH.); DASATINIB; BMS DASATINIB; ANHYDROUS DASATINIB; ANH. DASATINIB; N-(2-CHLORO-6-METHYLPHENYL)-2-({6-[4-(2-HYDROXYETHYL)PIPERAZIN-1-YL]-2-METHYLPYRIMIDIN-4-YL}AMINO)-1,3-THIAZOLE-5-CARBOXAMIDE; DASATINIB (ANHYDROUS)	DASATINIB	Multi-kinase inhibitor; SRC inhibitor; EPH receptor inhibitor; KIT inhibitor; Fusion protein inhibitor; PDGFR inhibitor	ABL; ABL1; ABL2; BCR-ABL1; BLK; EPHA2; FGR; FRK; FYN; HCK; KIT; LCK; LYN; PDGFR; PDGFRB; SRC; SRMS; STAT5B; YES1	GDSC	0.5	0.95	sig-21347	TANESPIMYCIN; 17AAG	TANESPIMYCIN	HSP inhibitor	HSP90AA1	PRISM	0.52	-1.04	sig-21347	TANESPIMYCIN; 17AAG	TANESPIMYCIN	HSP inhibitor	HSP90AA1	PRISM	0.52	2.04	sig-20896	DASATINIB ANHYDROUS; DASATINIB (ANH.); DASATINIB; BMS DASATINIB; ANHYDROUS DASATINIB; ANH. DASATINIB; N-(2-CHLORO-6-METHYLPHENYL)-2-({6-[4-(2-HYDROXYETHYL)PIPERAZIN-1-YL]-2-METHYLPYRIMIDIN-4-YL}AMINO)-1,3-THIAZOLE-5-CARBOXAMIDE; DASATINIB (ANHYDROUS)	DASATINIB	Multi-kinase inhibitor; SRC inhibitor; EPH receptor inhibitor; KIT inhibitor; Fusion protein inhibitor; PDGFR inhibitor	ABL; ABL1; ABL2; BCR-ABL1; BLK; EPHA2; FGR; FRK; FYN; HCK; KIT; LCK; LYN; PDGFR; PDGFRB; SRC; SRMS; STAT5B; YES1	GDSC	0.5	-1.85
sig-21055	LCL-161	LCL-161	Pro-apoptotic agent	BIRC2; XIAP	PRISM	0.57	0.86	sig-21390	EXATECAN-MESYLATE	EXATECAN-MESYLATE	DNA replication inhibitor; Topoisomerase inhibitor	TOP1	PRISM	0.47	-0.9	sig-21390	EXATECAN-MESYLATE	EXATECAN-MESYLATE	DNA replication inhibitor; Topoisomerase inhibitor	TOP1	PRISM	0.47	1.77	sig-21055	LCL-161	LCL-161	Pro-apoptotic agent	BIRC2; XIAP	PRISM	0.57	-1.69
sig-20903	SB505124	SB505124	TGFbeta receptor inhibitor	ACVR1B; ACVR1C; TGFBR1	GDSC	0.58	0.75	sig-20884	SUBEROYLANILIDE HYDROXAMIC ACID; OCTANEDIOIC ACID HYDROXYAMIDE PHENYLAMIDE; VORINOSTAT; SHH; SUBERANILOHYDROXAMIC ACID; SAHA	VORINOSTAT	Chromatin agent	HDAC1; HDAC10; HDAC11; HDAC2; HDAC3; HDAC4; HDAC5; HDAC6; HDAC7; HDAC8; HDAC9	GDSC	0.55	-0.76	sig-20884	SUBEROYLANILIDE HYDROXAMIC ACID; OCTANEDIOIC ACID HYDROXYAMIDE PHENYLAMIDE; VORINOSTAT; SHH; SUBERANILOHYDROXAMIC ACID; SAHA	VORINOSTAT	Chromatin agent	HDAC1; HDAC10; HDAC11; HDAC2; HDAC3; HDAC4; HDAC5; HDAC6; HDAC7; HDAC8; HDAC9	GDSC	0.55	1.49	sig-20903	SB505124	SB505124	TGFbeta receptor inhibitor	ACVR1B; ACVR1C; TGFBR1	GDSC	0.58	-1.46
sig-21216	ALPELISIB	ALPELISIB	PI3K/AKT/mTOR signaling inhibitor	PIK3CA; PIK3CB; PIK3CD; PIK3CG	PRISM	0.59	0.68	sig-20970	PROPANOLOL; SUMIAL; PROPANALOL; CIPLAR; 1-((1-METHYLETHYL)AMINO)-3-(1-NAPHTHALENYLOXY)-2-PROPANOL; PROPHYLUX; 螔-PROPRANOLOL; ANGILOL; INNOPRAN; DERALIN; BETA-PROPRANOLOL; CARDINOL; BEDRANOL SR; DOCITON; INDOBLOC; DURANOL; 1-(ISOPROPYLAMINO)-3-(1-NAPHTHYLOXY)PROPAN-2-OL; PROPRANOLOL	PROPRANOLOL	Adrenergic receptor antagonist		PRISM	0.48	-0.75	sig-20970	PROPANOLOL; SUMIAL; PROPANALOL; CIPLAR; 1-((1-METHYLETHYL)AMINO)-3-(1-NAPHTHALENYLOXY)-2-PROPANOL; PROPHYLUX; 螔-PROPRANOLOL; ANGILOL; INNOPRAN; DERALIN; BETA-PROPRANOLOL; CARDINOL; BEDRANOL SR; DOCITON; INDOBLOC; DURANOL; 1-(ISOPROPYLAMINO)-3-(1-NAPHTHYLOXY)PROPAN-2-OL; PROPRANOLOL	PROPRANOLOL	Adrenergic receptor antagonist		PRISM	0.48	1.46	sig-21216	ALPELISIB	ALPELISIB	PI3K/AKT/mTOR signaling inhibitor	PIK3CA; PIK3CB; PIK3CD; PIK3CG	PRISM	0.59	-1.34
sig-21432	SELUMETINIB:MK-2206 (8:1 MOL/MOL)	SELUMETINIB:MK-2206 (8:1 MOL/MOL)	Combination drug; MAPK inhibitor; PI3K/AKT/mTOR signaling inhibitor	AKT1; MAP2K1; MAP2K2	CTRP	0.48	0.66	sig-21224	DACINOSTAT	DACINOSTAT	Chromatin agent	HDAC1; HDAC2; HDAC3; HDAC4; HDAC5; HDAC6; HDAC7; HDAC8; HDAC9	PRISM	0.47	-0.73	sig-21224	DACINOSTAT	DACINOSTAT	Chromatin agent	HDAC1; HDAC2; HDAC3; HDAC4; HDAC5; HDAC6; HDAC7; HDAC8; HDAC9	PRISM	0.47	1.44	sig-21226	SELUMETINIB	SELUMETINIB	MAPK inhibitor	MAP2K1; MAP2K2; MEK1; MEK2	PRISM	0.47	-1.3
sig-21226	SELUMETINIB	SELUMETINIB	MAPK inhibitor	MAP2K1; MAP2K2; MEK1; MEK2	PRISM	0.47	0.66	sig-20962	BMS-754807	BMS-754807	IGF1R signaling inhibitor	IGF1R; INSR	GDSC	0.55	-0.69	sig-20962	BMS-754807	BMS-754807	IGF1R signaling inhibitor	IGF1R; INSR	GDSC	0.55	1.35	sig-21432	SELUMETINIB:MK-2206 (8:1 MOL/MOL)	SELUMETINIB:MK-2206 (8:1 MOL/MOL)	Combination drug; MAPK inhibitor; PI3K/AKT/mTOR signaling inhibitor	AKT1; MAP2K1; MAP2K2	CTRP	0.48	-1.29
sig-21310	SNX-2112	SNX-2112	HSP inhibitor	HSP90AA1; HSP90B1	PRISM	0.41	0.66	sig-20973	NVP-231	NVP-231	Lipid metabolism inhibitor; Sphingolipid metabolism inhibitor	CERK	CTRP	0.52	-0.66	sig-20973	NVP-231	NVP-231	Lipid metabolism inhibitor; Sphingolipid metabolism inhibitor	CERK	CTRP	0.52	1.28	sig-21310	SNX-2112	SNX-2112	HSP inhibitor	HSP90AA1; HSP90B1	PRISM	0.41	-1.29
sig-21191	PODOPHYLLINIC ACID LACTONE; PODOPHYLLOTOXIN 7; PODOFILOX; PODOPHYLLOTOXIN; (鈭?-PODOPHYLLOTOXIN; PPT	PODOPHYLLOTOXIN	Microtubule agent; DNA replication inhibitor; Topoisomerase inhibitor	IGF1R; TOP2A; TUBA4A; TUBB	PRISM	0.47	0.6	sig-20999	AMETYCINE; MMC; 7-AMINO-9ALPHA-METHOXYMITOSANE; MITAMYCIN; MITOCIN-C; MITOMYCIN C; MITOZYTREX; MITOMYCIN	MITOMYCIN	DNA replication inhibitor; DNA damaging agent		PRISM	0.42	-0.65	sig-20999	AMETYCINE; MMC; 7-AMINO-9ALPHA-METHOXYMITOSANE; MITAMYCIN; MITOCIN-C; MITOMYCIN C; MITOZYTREX; MITOMYCIN	MITOMYCIN	DNA replication inhibitor; DNA damaging agent		PRISM	0.42	1.27	sig-21191	PODOPHYLLINIC ACID LACTONE; PODOPHYLLOTOXIN 7; PODOFILOX; PODOPHYLLOTOXIN; (鈭?-PODOPHYLLOTOXIN; PPT	PODOPHYLLOTOXIN	Microtubule agent; DNA replication inhibitor; Topoisomerase inhibitor	IGF1R; TOP2A; TUBA4A; TUBB	PRISM	0.47	-1.18
sig-21008	SANGIVAMYCIN	SANGIVAMYCIN	DNA replication inhibitor		PRISM	0.5	0.59	sig-21180	OTX015	OTX015	Chromatin agent	BRD2; BRD3; BRD4	PRISM	0.58	-0.63	sig-21180	OTX015	OTX015	Chromatin agent	BRD2; BRD3; BRD4	PRISM	0.58	1.23	sig-21008	SANGIVAMYCIN	SANGIVAMYCIN	DNA replication inhibitor		PRISM	0.5	-1.16
sig-21174	N-(2-{[2-(DIMETHYLAMINO)ETHYL](METHYL)AMINO}-4-METHOXY-5-{[4-(1-METHYL-1H-INDOL-3-YL)PYRIMIDIN-2-YL]AMINO}PHENYL)PROP-2-ENAMIDE; OSIMERTINIB; MERELETINIB	OSIMERTINIB	ErbB inhibitor	EGFR	PRISM	0.56	0.58	sig-21235	MLN0128	MLN0128	PI3K/AKT/mTOR signaling inhibitor	MTOR; PIK3CA; PIK3CD; PIK3CG	PRISM	0.5	-0.6	sig-21023	RITA	RITA	p53 activator/MDM2 inhibitor	MDM2; TP53	PRISM	0.44	1.18	sig-21174	N-(2-{[2-(DIMETHYLAMINO)ETHYL](METHYL)AMINO}-4-METHOXY-5-{[4-(1-METHYL-1H-INDOL-3-YL)PYRIMIDIN-2-YL]AMINO}PHENYL)PROP-2-ENAMIDE; OSIMERTINIB; MERELETINIB	OSIMERTINIB	ErbB inhibitor	EGFR	PRISM	0.56	-1.14
sig-21147	DFBA; DIFLUPREDNATE; DIFLUOROPREDNISOLONE BUTYRATE ACETATE	DIFLUPREDNATE	Glucocorticoid receptor agonist	NR3C1	PRISM	0.53	0.58	sig-21023	RITA	RITA	p53 activator/MDM2 inhibitor	MDM2; TP53	PRISM	0.44	-0.6	sig-21235	MLN0128	MLN0128	PI3K/AKT/mTOR signaling inhibitor	MTOR; PIK3CA; PIK3CD; PIK3CG	PRISM	0.5	1.17	sig-21147	DFBA; DIFLUPREDNATE; DIFLUOROPREDNISOLONE BUTYRATE ACETATE	DIFLUPREDNATE	Glucocorticoid receptor agonist	NR3C1	PRISM	0.53	-1.13
sig-21079	R428	R428	AXL inhibitor	AXL	CTRP	0.47	0.58	sig-21342	5-AZA-2'-DEOXYCYTIDINE; 4-AMINO-1-(2-DEOXY-螔-D-ERYTHRO-PENTOFURANOSYL)-S-TRIAZIN-2(1H)-ONE; DAC; 5-AZADEOXYCYTIDINE; DECITABINE	DECITABINE	DNA methyltransferase inhibitor	DNMT1; DNMT3A	PRISM	0.5	-0.58	sig-21342	5-AZA-2'-DEOXYCYTIDINE; 4-AMINO-1-(2-DEOXY-螔-D-ERYTHRO-PENTOFURANOSYL)-S-TRIAZIN-2(1H)-ONE; DAC; 5-AZADEOXYCYTIDINE; DECITABINE	DECITABINE	DNA methyltransferase inhibitor	DNMT1; DNMT3A	PRISM	0.5	1.13	sig-21079	R428	R428	AXL inhibitor	AXL	CTRP	0.47	-1.13
sig-20982	NECTROLIDE; SYNERGISIDIN; (+)-BREFELDIN A; DECUMBIN; CYANEIN; ASCOTOXIN	BREFELDIN A	Protein trafficking inhibitor; CRISPR/Cas9 activator	ARF1	CTRP	0.49	0.56	sig-21153	FQI-2	FQI-2	LSF1-mediated transcription inhibitor		CTRP	0.45	-0.58	sig-21153	FQI-2	FQI-2	LSF1-mediated transcription inhibitor		CTRP	0.45	1.13	sig-20982	NECTROLIDE; SYNERGISIDIN; (+)-BREFELDIN A; DECUMBIN; CYANEIN; ASCOTOXIN	BREFELDIN A	Protein trafficking inhibitor; CRISPR/Cas9 activator	ARF1	CTRP	0.49	-1.1
sig-21119	ETHACRIDINE-LACTATE-MONOHYDRATE	ETHACRIDINE-LACTATE-MONOHYDRATE	DNA replication inhibitor; DNA damaging agent		PRISM	0.55	0.55	sig-20943	DIHYDROROTENONE	DIHYDROROTENONE	Mitochondrial inhibitor		GDSC	0.43	-0.56	sig-20943	DIHYDROROTENONE	DIHYDROROTENONE	Mitochondrial inhibitor		GDSC	0.43	1.1	sig-21158	I-BET151	I-BET151	BET inhibitor	BRD2; BRD3; BRD4	CTRP	0.54	-1.08
sig-21158	I-BET151	I-BET151	BET inhibitor	BRD2; BRD3; BRD4	CTRP	0.54	0.55	sig-20986	BRUCEANTIN	BRUCEANTIN	Protein synthesis inhibitor		PRISM	0.51	-0.55	sig-20986	BRUCEANTIN	BRUCEANTIN	Protein synthesis inhibitor		PRISM	0.51	1.08	sig-21119	ETHACRIDINE-LACTATE-MONOHYDRATE	ETHACRIDINE-LACTATE-MONOHYDRATE	DNA replication inhibitor; DNA damaging agent		PRISM	0.55	-1.07
sig-21195	1-HYDROXYCHOLECALCIFEROL; 1螒-HYDROXYVITAMIN D3; 9,10-SECOCHOLESTA-5,7,10(19)-TRIENE-1螒,3螔-DIOL; ALFACALCIDOL; 1ALPHA-HYDROXYCHOLECALCIFEROL; 1螒-HYDROXY-VITAMIN D3; (5Z,7E)-9,10-SECO-5,7,10(19)-CHOLESTATRIEN-1螒,3螔-DIOL; ALSIODOL; ONE ALPHA; 1螒-HYDROXYCHOLECALCIFEROL	ALFACALCIDOL	Vitamin D receptor agonist	CYP27B1; VDR	PRISM	0.45	0.54	sig-21265	BARASERTIB-HQPA	BARASERTIB-HQPA	Cell cycle arrest; Aurora kinase inhibitor	AURKB	PRISM	0.48	-0.54	sig-21265	BARASERTIB-HQPA	BARASERTIB-HQPA	Cell cycle arrest; Aurora kinase inhibitor	AURKB	PRISM	0.48	1.06	sig-21195	1-HYDROXYCHOLECALCIFEROL; 1螒-HYDROXYVITAMIN D3; 9,10-SECOCHOLESTA-5,7,10(19)-TRIENE-1螒,3螔-DIOL; ALFACALCIDOL; 1ALPHA-HYDROXYCHOLECALCIFEROL; 1螒-HYDROXY-VITAMIN D3; (5Z,7E)-9,10-SECO-5,7,10(19)-CHOLESTATRIEN-1螒,3螔-DIOL; ALSIODOL; ONE ALPHA; 1螒-HYDROXYCHOLECALCIFEROL	ALFACALCIDOL	Vitamin D receptor agonist	CYP27B1; VDR	PRISM	0.45	-1.07
sig-21227	DACOMITINIB; DACOMITINIB ANHYDROUS	DACOMITINIB	ErbB inhibitor	EGFR; ERBB2; ERBB4	PRISM	0.47	0.52	sig-21287	PEVONEDISTAT	PEVONEDISTAT	NAE inhibitor	NAE1	CTRP	0.43	-0.54	sig-21287	PEVONEDISTAT	PEVONEDISTAT	NAE inhibitor	NAE1	CTRP	0.43	1.06	sig-21227	DACOMITINIB; DACOMITINIB ANHYDROUS	DACOMITINIB	ErbB inhibitor	EGFR; ERBB2; ERBB4	PRISM	0.47	-1.01
sig-21126	TAK-733	TAK-733	MAPK inhibitor	MAP2K1	PRISM	0.54	0.51	sig-21064	PF-184	PF-184	NFkB signaling inhibitor	IKBKB	CTRP	0.52	-0.5	sig-21064	PF-184	PF-184	NFkB signaling inhibitor	IKBKB	CTRP	0.52	0.98	sig-21126	TAK-733	TAK-733	MAPK inhibitor	MAP2K1	PRISM	0.54	-1
sig-21072	TG-101348	TG-101348	JAK-STAT signaling inhibitor	JAK2	CTRP	0.47	0.51	sig-21284	CYCLOCYTIDINE	CYCLOCYTIDINE	DNA replication inhibitor; Transcription inhibitor		PRISM	0.58	-0.47	sig-21334	LY-2090314	LY2090314	GSK3 inhibitor	GSK3B	PRISM	0.47	0.93	sig-21072	TG-101348	TG-101348	JAK-STAT signaling inhibitor	JAK2	CTRP	0.47	-0.99
sig-21440	SELUMETINIB:DECITABINE (4:1 MOL/MOL)	SELUMETINIB:DECITABINE (4:1 MOL/MOL)	Combination drug; MAPK inhibitor; DNA methyltransferase inhibitor	DNMT1; MAP2K1; MAP2K2	CTRP	0.45	0.51	sig-21164	4'-DEMETHYLEPIPODOPHYLLOTOXIN 9-(4,6-O-(R)-ETHYLIDENE-BETA-D-GLUCOPYRANOSIDE); 9-((4,6-O-ETHYLIDINE-BETA-D-GLUCOPYRANOSYL)OXY)-5,8,8A,9-TETRAHYDRO-5-(4-HYDROXY-3,4-DIMETHYLOXYPHENYL)FURO(3',4'':6,7)NAPTHO-(2,3-D)-1,3-DIOXOL-6(5AH)-ONE; ETOPOSIDE; ETOPOFOS; 4-DEMETHYLEPIPODOPHYLLOTOXIN 螔-D-ETHYLIDENEGLUCOSIDE; V脡P脡SIDE; VEPESID K; LASTET; TRANS-ETOPOSIDE; NEXVEP; (鈭?-ETOPOSIDE	ETOPOSIDE	Topoisomerase inhibitor; DNA replication inhibitor	TOP2A	CTRP	0.51	-0.47	sig-21284	CYCLOCYTIDINE	CYCLOCYTIDINE	DNA replication inhibitor; Transcription inhibitor		PRISM	0.58	0.92	sig-21440	SELUMETINIB:DECITABINE (4:1 MOL/MOL)	SELUMETINIB:DECITABINE (4:1 MOL/MOL)	Combination drug; MAPK inhibitor; DNA methyltransferase inhibitor	DNMT1; MAP2K1; MAP2K2	CTRP	0.45	-0.99
sig-21367	NERATINIB	NERATINIB	ErbB inhibitor	EGFR; ERBB2	CTRP	0.56	0.5	sig-21334	LY-2090314	LY2090314	GSK3 inhibitor	GSK3B	PRISM	0.47	-0.47	sig-21164	4'-DEMETHYLEPIPODOPHYLLOTOXIN 9-(4,6-O-(R)-ETHYLIDENE-BETA-D-GLUCOPYRANOSIDE); 9-((4,6-O-ETHYLIDINE-BETA-D-GLUCOPYRANOSYL)OXY)-5,8,8A,9-TETRAHYDRO-5-(4-HYDROXY-3,4-DIMETHYLOXYPHENYL)FURO(3',4'':6,7)NAPTHO-(2,3-D)-1,3-DIOXOL-6(5AH)-ONE; ETOPOSIDE; ETOPOFOS; 4-DEMETHYLEPIPODOPHYLLOTOXIN 螔-D-ETHYLIDENEGLUCOSIDE; V脡P脡SIDE; VEPESID K; LASTET; TRANS-ETOPOSIDE; NEXVEP; (鈭?-ETOPOSIDE	ETOPOSIDE	Topoisomerase inhibitor; DNA replication inhibitor	TOP2A	CTRP	0.51	0.92	sig-21441	SELUMETINIB:JQ-1 (4:1 MOL/MOL)	SELUMETINIB:JQ-1 (4:1 MOL/MOL)	Chromatin agent; Combination drug; MAPK inhibitor	BRDT; MAP2K1; MAP2K2	CTRP	0.5	-0.98
sig-21441	SELUMETINIB:JQ-1 (4:1 MOL/MOL)	SELUMETINIB:JQ-1 (4:1 MOL/MOL)	Chromatin agent; Combination drug; MAPK inhibitor	BRDT; MAP2K1; MAP2K2	CTRP	0.5	0.5	sig-20927	AZD-5991	AZD5991	Pro-apoptotic agent	MCL1	GDSC	0.43	-0.47	sig-20927	AZD-5991	AZD5991	Pro-apoptotic agent	MCL1	GDSC	0.43	0.92	sig-21213	JQ-1	JQ-1	Chromatin agent	BRDT	CTRP	0.49	-0.98
sig-21213	JQ-1	JQ-1	Chromatin agent	BRDT	CTRP	0.49	0.5	sig-21448	CARBOPLATIN:ETOPOSIDE (40:17 MOL/MOL)	CARBOPLATIN:ETOPOSIDE (40:17 MOL/MOL)	Combination drug; DNA replication inhibitor	TOP2A	CTRP	0.49	-0.46	sig-21448	CARBOPLATIN:ETOPOSIDE (40:17 MOL/MOL)	CARBOPLATIN:ETOPOSIDE (40:17 MOL/MOL)	Combination drug; DNA replication inhibitor	TOP2A	CTRP	0.49	0.9	sig-21367	NERATINIB	NERATINIB	ErbB inhibitor	EGFR; ERBB2	CTRP	0.56	-0.97
sig-21175	SUNITINIB	SUNITINIB	Multi-kinase inhibitor; PDGFR inhibitor; KIT inhibitor; VEGFR inhibitor; FLT3 inhibitor	FLT1; FLT3; KDR; KIT; PDGFRA; PDGFRB	CTRP	0.45	0.5	sig-21039	FORETINIB	FORETINIB	Multi-kinase inhibitor; MET inhibitor; VEGFR inhibitor; KDR inhibitor	EGFR; FGFR1; FLT1; FLT4; KDR; MET; PDGFR; RON; TIE2	PRISM	0.59	-0.45	sig-21039	FORETINIB	FORETINIB	Multi-kinase inhibitor; MET inhibitor; VEGFR inhibitor; KDR inhibitor	EGFR; FGFR1; FLT1; FLT4; KDR; MET; PDGFR; RON; TIE2	PRISM	0.59	0.88	sig-21175	SUNITINIB	SUNITINIB	Multi-kinase inhibitor; PDGFR inhibitor; KIT inhibitor; VEGFR inhibitor; FLT3 inhibitor	FLT1; FLT3; KDR; KIT; PDGFRA; PDGFRB	CTRP	0.45	-0.97
sig-21305	[6,7-BIS-(2-METHOXY-ETHOXY)-QUINAZOLIN-4-YL]-(3-ETHYNYL-PHENYL)-AMINE; ERLOTINIB	ERLOTINIB	ErbB inhibitor; Nuclear receptor binder	EGFR; ERBB2; NR1I2	PRISM	0.57	0.49	sig-21015	MYRIOCIN	MYRIOCIN	Sphingolipid metabolism inhibitor; Lipid metabolism inhibitor	SPTLC1; SPTLC2; SPTLC3	CTRP	0.47	-0.45	sig-21015	MYRIOCIN	MYRIOCIN	Sphingolipid metabolism inhibitor; Lipid metabolism inhibitor	SPTLC1; SPTLC2; SPTLC3	CTRP	0.47	0.88	sig-21040	MERCK60	MERCK60	Chromatin agent	HDAC1; HDAC2	CTRP	0.43	-0.97
sig-21040	MERCK60	MERCK60	Chromatin agent	HDAC1; HDAC2	CTRP	0.43	0.49	sig-21050	DANUSERTIB	DANUSERTIB	Cell cycle arrest; Aurora kinase inhibitor	AURKA; AURKB; AURKC; FGFR1; NTRK1; RET; SLK	PRISM	0.47	-0.45	sig-21050	DANUSERTIB	DANUSERTIB	Cell cycle arrest; Aurora kinase inhibitor	AURKA; AURKB; AURKC; FGFR1; NTRK1; RET; SLK	PRISM	0.47	0.87	sig-21305	[6,7-BIS-(2-METHOXY-ETHOXY)-QUINAZOLIN-4-YL]-(3-ETHYNYL-PHENYL)-AMINE; ERLOTINIB	ERLOTINIB	ErbB inhibitor; Nuclear receptor binder	EGFR; ERBB2; NR1I2	PRISM	0.57	-0.95
sig-21457	SELUMETINIB:PIPERLONGUMINE (8:1 MOL/MOL)	SELUMETINIB:PIPERLONGUMINE (8:1 MOL/MOL)	ROS/RNS modulator; MAPK inhibitor; Combination drug	MAP2K1; MAP2K2	CTRP	0.51	0.48	sig-21338	MLN2238	MLN2238	Ubiquitin-proteasome system inhibitor	PSMB5	CTRP	0.45	-0.45	sig-21338	MLN2238	MLN2238	Ubiquitin-proteasome system inhibitor	PSMB5	CTRP	0.45	0.87	sig-21457	SELUMETINIB:PIPERLONGUMINE (8:1 MOL/MOL)	SELUMETINIB:PIPERLONGUMINE (8:1 MOL/MOL)	ROS/RNS modulator; MAPK inhibitor; Combination drug	MAP2K1; MAP2K2	CTRP	0.51	-0.94
sig-21416	ABT-869; LINIFANIB	LINIFANIB	FLT3 inhibitor; Multi-kinase inhibitor; VEGFR inhibitor; PDGFR inhibitor; KIT inhibitor	FLT1; FLT3; KDR	CTRP	0.5	0.48	sig-21451	NAVITOCLAX:GEMCITABINE (1:1 MOL/MOL)	NAVITOCLAX:GEMCITABINE (1:1 MOL/MOL)	DNA replication inhibitor; Pro-apoptotic agent; Combination drug	BCL2; BCL2L1; BCL2L2; CMPK1; RRM1; TYMS	CTRP	0.55	-0.44	sig-20997	WYE-125132	WYE-125132	PI3K/AKT/mTOR signaling inhibitor	MTOR	PRISM	0.42	0.87	sig-21416	ABT-869; LINIFANIB	LINIFANIB	FLT3 inhibitor; Multi-kinase inhibitor; VEGFR inhibitor; PDGFR inhibitor; KIT inhibitor	FLT1; FLT3; KDR	CTRP	0.5	-0.93
sig-21443	JQ-1:UNC0638 (2:1 MOL/MOL)	JQ-1:UNC0638 (2:1 MOL/MOL)	Combination drug; Chromatin agent	BRDT; EHMT1; EHMT2	CTRP	0.47	0.48	sig-20997	WYE-125132	WYE-125132	PI3K/AKT/mTOR signaling inhibitor	MTOR	PRISM	0.42	-0.44	sig-21451	NAVITOCLAX:GEMCITABINE (1:1 MOL/MOL)	NAVITOCLAX:GEMCITABINE (1:1 MOL/MOL)	DNA replication inhibitor; Pro-apoptotic agent; Combination drug	BCL2; BCL2L1; BCL2L2; CMPK1; RRM1; TYMS	CTRP	0.55	0.86	sig-21443	JQ-1:UNC0638 (2:1 MOL/MOL)	JQ-1:UNC0638 (2:1 MOL/MOL)	Combination drug; Chromatin agent	BRDT; EHMT1; EHMT2	CTRP	0.47	-0.93
sig-21071	TRAMETINIB	TRAMETINIB	MAPK inhibitor	MAP2K1; MAP2K2; MEK1; MEK2	PRISM	0.49	0.47	sig-21137	AMBOCHLORIN; 4-[P-[BIS(2-CHLOROETHYL)AMINO]PHENYL]BUTYRIC ACID; GAMMA-[P-DI(2-CHLOROETHYL)AMINOPHENYL]BUTYRIC ACID; CHLORAMBUCIL; 4-(P-BIS(BETA-CHLOROETHYL)AMINOPHENYL)BUTYRIC ACID; 螕-[P-DI(2-CHLOROETHYL)AMINOPHENYL]BUTYRIC ACID; CELKERAN; PHENYLBUTYRIC ACID NITROGEN MUSTARD; N,N-DI-2-CHLOROETHYL-GAMMA-P-AMINOPHENYLBUTYRIC ACID; N,N-DI-2-CHLOROETHYL-螕-P-AMINOPHENYLBUTYRIC ACID; CHLORAMINOPH脠NE; C…	CHLORAMBUCIL	DNA replication inhibitor; DNA damaging agent		CTRP	0.44	-0.43	sig-21137	AMBOCHLORIN; 4-[P-[BIS(2-CHLOROETHYL)AMINO]PHENYL]BUTYRIC ACID; GAMMA-[P-DI(2-CHLOROETHYL)AMINOPHENYL]BUTYRIC ACID; CHLORAMBUCIL; 4-(P-BIS(BETA-CHLOROETHYL)AMINOPHENYL)BUTYRIC ACID; 螕-[P-DI(2-CHLOROETHYL)AMINOPHENYL]BUTYRIC ACID; CELKERAN; PHENYLBUTYRIC ACID NITROGEN MUSTARD; N,N-DI-2-CHLOROETHYL-GAMMA-P-AMINOPHENYLBUTYRIC ACID; N,N-DI-2-CHLOROETHYL-螕-P-AMINOPHENYLBUTYRIC ACID; CHLORAMINOPH脠NE; C…	CHLORAMBUCIL	DNA replication inhibitor; DNA damaging agent		CTRP	0.44	0.85	sig-21071	TRAMETINIB	TRAMETINIB	MAPK inhibitor	MAP2K1; MAP2K2; MEK1; MEK2	PRISM	0.49	-0.92
sig-21343	PENTAAZACENTOPTHYLENE; TCN; TRICIRIBINE	TRICIRIBINE	PI3K/AKT/mTOR signaling inhibitor	AKT1; AKT2; AKT3	PRISM	0.56	0.46	sig-20885	NILOTINIB	NILOTINIB	Multi-kinase inhibitor; Fusion protein inhibitor; ABL inhibitor; KIT inhibitor	ABL; ABL1; BCR; BCR-ABL1; KIT	GDSC	0.5	-0.42	sig-21402	CHM-1	CHM-1	Microtubule agent		CTRP	0.49	0.83	sig-21343	PENTAAZACENTOPTHYLENE; TCN; TRICIRIBINE	TRICIRIBINE	PI3K/AKT/mTOR signaling inhibitor	AKT1; AKT2; AKT3	PRISM	0.56	-0.9
sig-21378	N-[(1R)-1-(DIHYDROXYBORYL)-3-METHYLBUTYL]-N-(PYRAZIN-2-YLCARBONYL)-L-PHENYLALANINAMIDE; BORTEZOMIB; [(1R)-3-METHYL-1-({(2S)-3-PHENYL-2-[(PYRAZIN-2-YLCARBONYL)AMINO]PROPANOYL}AMINO)BUTYL]BORONIC ACID	BORTEZOMIB	NFkB signaling inhibitor; Ubiquitin-proteasome system inhibitor	PSMA1; PSMA2; PSMA3; PSMA4; PSMA5; PSMA6; PSMA7; PSMA8; PSMB1; PSMB10; PSMB11; PSMB2; PSMB3; PSMB4; PSMB5; PSMB6; PSMB7; PSMB8; PSMB9; PSMD1; PSMD2; RELA	PRISM	0.41	0.45	sig-21136	BGT226	BGT226	PI3K/AKT/mTOR signaling inhibitor	MTOR; PIK3CA; PIK3CB; PIK3CG	PRISM	0.5	-0.42	sig-21241	BESTATIN; UBENIMEX	UBENIMEX	Leukotriene synthesis inhibitor; Proteolysis inhibitor	LTA4H; RNPEP	PRISM	0.46	0.83	sig-21378	N-[(1R)-1-(DIHYDROXYBORYL)-3-METHYLBUTYL]-N-(PYRAZIN-2-YLCARBONYL)-L-PHENYLALANINAMIDE; BORTEZOMIB; [(1R)-3-METHYL-1-({(2S)-3-PHENYL-2-[(PYRAZIN-2-YLCARBONYL)AMINO]PROPANOYL}AMINO)BUTYL]BORONIC ACID	BORTEZOMIB	NFkB signaling inhibitor; Ubiquitin-proteasome system inhibitor	PSMA1; PSMA2; PSMA3; PSMA4; PSMA5; PSMA6; PSMA7; PSMA8; PSMB1; PSMB10; PSMB11; PSMB2; PSMB3; PSMB4; PSMB5; PSMB6; PSMB7; PSMB8; PSMB9; PSMD1; PSMD2; RELA	PRISM	0.41	-0.87
sig-21449	SELUMETINIB:BRD-A02303741 (4:1 MOL/MOL)	SELUMETINIB:BRD-A02303741 (4:1 MOL/MOL)	Combination drug; MAPK inhibitor; Chromatin agent	DOT1L; MAP2K1; MAP2K2	CTRP	0.51	0.44	sig-21402	CHM-1	CHM-1	Microtubule agent		CTRP	0.49	-0.42	sig-20885	NILOTINIB	NILOTINIB	Multi-kinase inhibitor; Fusion protein inhibitor; ABL inhibitor; KIT inhibitor	ABL; ABL1; BCR; BCR-ABL1; KIT	GDSC	0.5	0.82	sig-21415	PLINABULIN	PLINABULIN	Microtubule agent		PRISM	0.45	-0.86
sig-21415	PLINABULIN	PLINABULIN	Microtubule agent		PRISM	0.45	0.44	sig-21328	MYELOSTAT; OMACETAXINE MEPESUCCINATE; HHT; HOMOHARRINGTONINE; (2'R,3S,4S,5R)-(鈭?-HOMOHARRINGTONINE; HOMOHARRINGTONIN; (鈭?-HOMOHARRINGTONINE; CEFLATONIN	OMACETAXINE MEPESUCCINATE	Protein synthesis inhibitor	RPL3	PRISM	0.47	-0.42	sig-21136	BGT226	BGT226	PI3K/AKT/mTOR signaling inhibitor	MTOR; PIK3CA; PIK3CB; PIK3CG	PRISM	0.5	0.82	sig-21449	SELUMETINIB:BRD-A02303741 (4:1 MOL/MOL)	SELUMETINIB:BRD-A02303741 (4:1 MOL/MOL)	Combination drug; MAPK inhibitor; Chromatin agent	DOT1L; MAP2K1; MAP2K2	CTRP	0.51	-0.85
sig-21409	PLURIPOTIN	PLURIPOTIN	MAPK inhibitor	MAPK1; RASAL1	CTRP	0.58	0.43	sig-21241	BESTATIN; UBENIMEX	UBENIMEX	Leukotriene synthesis inhibitor; Proteolysis inhibitor	LTA4H; RNPEP	PRISM	0.46	-0.42	sig-21328	STF-31	STF-31	NAMPT inhibitor	NAMPT	CTRP	0.51	0.81	sig-21409	PLURIPOTIN	PLURIPOTIN	MAPK inhibitor	MAPK1; RASAL1	CTRP	0.58	-0.84
sig-21433	SELUMETINIB:UNC0638 (4:1 MOL/MOL)	SELUMETINIB:UNC0638 (4:1 MOL/MOL)	Combination drug; MAPK inhibitor; Chromatin agent	EHMT1; EHMT2; MAP2K1; MAP2K2	CTRP	0.54	0.43	sig-21318	2-OXO-2-[(2S,4S)-2,5,12-TRIHYDROXY-7-METHOXY-6,11-DIOXO-4-({2,3,6-TRIDEOXY-3-[(TRIFLUOROACETYL)AMINO]HEXOPYRANOSYL}OXY)-1,2,3,4,6,11-HEXAHYDROTETRACEN-2-YL]ETHYL PENTANOATE; VALRUBICIN; (8S, 10S)-8-GLYCOLOYL-7,8,9,10-TETRAHYDRO-6,8,11-TRIHYDROXY-1-METHOXY-10-[[2,3,6-TRIDEOXY-3-(2,2,2-TRIFLUOROACETAMIDO)-螒-L-LYXO-HEXOPYRANOSYL]OXY]-5,12-NAPHTHACENEDIONE 8虏-VALERATE	VALRUBICIN	DNA replication inhibitor; Topoisomerase inhibitor	TOP2A	PRISM	0.52	-0.41	sig-21110	MYELOSTAT; OMACETAXINE MEPESUCCINATE; HHT; HOMOHARRINGTONINE; (2'R,3S,4S,5R)-(鈭?-HOMOHARRINGTONINE; HOMOHARRINGTONIN; (鈭?-HOMOHARRINGTONINE; CEFLATONIN	OMACETAXINE MEPESUCCINATE	Protein synthesis inhibitor	RPL3	PRISM	0.47	0.81	sig-21431	TRETINOIN:CARBOPLATIN (2:1 MOL/MOL)	TRETINOIN:CARBOPLATIN (2:1 MOL/MOL)	Combination drug; Retinoid acid receptor agonist; DNA replication inhibitor	RARA; RARB; RARG	CTRP	0.51	-0.84
sig-21431	TRETINOIN:CARBOPLATIN (2:1 MOL/MOL)	TRETINOIN:CARBOPLATIN (2:1 MOL/MOL)	Combination drug; Retinoid acid receptor agonist; DNA replication inhibitor	RARA; RARB; RARG	CTRP	0.51	0.43	sig-21110	STF-31	STF-31	NAMPT inhibitor	NAMPT	CTRP	0.51	-0.41	sig-21318	2-OXO-2-[(2S,4S)-2,5,12-TRIHYDROXY-7-METHOXY-6,11-DIOXO-4-({2,3,6-TRIDEOXY-3-[(TRIFLUOROACETYL)AMINO]HEXOPYRANOSYL}OXY)-1,2,3,4,6,11-HEXAHYDROTETRACEN-2-YL]ETHYL PENTANOATE; VALRUBICIN; (8S, 10S)-8-GLYCOLOYL-7,8,9,10-TETRAHYDRO-6,8,11-TRIHYDROXY-1-METHOXY-10-[[2,3,6-TRIDEOXY-3-(2,2,2-TRIFLUOROACETAMIDO)-螒-L-LYXO-HEXOPYRANOSYL]OXY]-5,12-NAPHTHACENEDIONE 8虏-VALERATE	VALRUBICIN	DNA replication inhibitor; Topoisomerase inhibitor	TOP2A	PRISM	0.52	0.79	sig-21433	SELUMETINIB:UNC0638 (4:1 MOL/MOL)	SELUMETINIB:UNC0638 (4:1 MOL/MOL)	Combination drug; MAPK inhibitor; Chromatin agent	EHMT1; EHMT2; MAP2K1; MAP2K2	CTRP	0.54	-0.83
sig-21444	JQ-1:VORINOSTAT (2:1 MOL/MOL)	JQ-1:VORINOSTAT (2:1 MOL/MOL)	Combination drug; Chromatin agent	BRDT; HDAC1; HDAC2; HDAC3; HDAC6; HDAC8	CTRP	0.54	0.42	sig-21139	AXITINIB	AXITINIB	VEGFR inhibitor	CSF1; FLT1; FLT3; FLT4; KDR; KIT; PDGFRA; PDGFRB; PLK4	PRISM	0.47	-0.41	sig-21139	NEOPELTOLIDE	NEOPELTOLIDE	Cellular respiration inhibitor		CTRP	0.49	0.79	sig-21444	JQ-1:VORINOSTAT (2:1 MOL/MOL)	JQ-1:VORINOSTAT (2:1 MOL/MOL)	Combination drug; Chromatin agent	BRDT; HDAC1; HDAC2; HDAC3; HDAC6; HDAC8	CTRP	0.54	-0.83
sig-21234	AZ-3146	AZ-3146	Cell cycle arrest; TTK inhibitor	TTK	CTRP	0.53	0.4	sig-21255	NEOPELTOLIDE	NEOPELTOLIDE	Cellular respiration inhibitor		CTRP	0.49	-0.4	sig-21255	AXITINIB	AXITINIB	VEGFR inhibitor	CSF1; FLT1; FLT3; FLT4; KDR; KIT; PDGFRA; PDGFRB; PLK4	PRISM	0.47	0.79	sig-21234	AZ-3146	AZ-3146	Cell cycle arrest; TTK inhibitor	TTK	CTRP	0.53	-0.79
sig-20919	AZD5582	AZD5582	Pro-apoptotic agent	BIRC2; BIRC3; XIAP	GDSC	0.52	0.4									sig-21408	GSK-J4	GSK-J4	Chromatin agent	KDM6A; KDM6B	CTRP	0.51	0.75	sig-21271	ABERELA; ALL-TRANS-TRETINOIN; ALL-TRANS-BETA-RETINOIC ACID; (ALL-E)-3,7-DIMETHYL-9-(2,6,6-TRIMETHYL-1-CYCLOHEXEN-1-YL)-2,4,6,8-NONATETRAENOIC ACID; DERMAIROL; VITAMIN A ACID; ALL-TRANS-RETINOIC ACID; RETIONIC ACID; ALL-TRANS-VITAMIN A ACID; ALL-(E)-RETINOIC ACID; RETINOIC ACID; ALL TRANS-RETINOIC ACID; ATRA; TRETIN M; BETA-RETINOIC ACID; VITINOIN; TRETINOIN; AIROL; ALL-TRANS-VITAMIN A1 ACID; 3,7-…	TRETINOIN	Retinoid acid receptor agonist	RARA; RARB; RARG	CTRP	0.52	-0.79
sig-21271	ABERELA; ALL-TRANS-TRETINOIN; ALL-TRANS-BETA-RETINOIC ACID; (ALL-E)-3,7-DIMETHYL-9-(2,6,6-TRIMETHYL-1-CYCLOHEXEN-1-YL)-2,4,6,8-NONATETRAENOIC ACID; DERMAIROL; VITAMIN A ACID; ALL-TRANS-RETINOIC ACID; RETIONIC ACID; ALL-TRANS-VITAMIN A ACID; ALL-(E)-RETINOIC ACID; RETINOIC ACID; ALL TRANS-RETINOIC ACID; ATRA; TRETIN M; BETA-RETINOIC ACID; VITINOIN; TRETINOIN; AIROL; ALL-TRANS-VITAMIN A1 ACID; 3,7-…	TRETINOIN	Retinoid acid receptor agonist	RARA; RARB; RARG	CTRP	0.52	0.4																	sig-21229	HESPERADIN	HESPERADIN	Cell cycle arrest; Aurora kinase inhibitor	AURKB	PRISM	0.45	-0.79
sig-21151	(8R,9S,10R,13S,14S,17R)-13-ETHYL-17-ETHYNYL-17-HYDROXY- 1,2,6,7,8,9,10,11,12,13,14,15,16, 17- TETRADECAHYDROCYCLOPENTA[A] PHENANTHREN-3-ONE; MICROLUTON; LEVONELLE; 17-ETHYNYL-18-METHYL-19-NORTESTOSTERONE; POSTINOR; NEOGEST; (-)-13-ETHYL-17-HYDROXY-18,19-DINOR-17ALPHA-PREGN-4-EN-20-YN-3-ONE; D(-)-NORGESTREL; LEVONORGESTREL; 13-ETHYL-17-ALPHA-ETHYNYL-17-BETA-HYDROXY-4-GONEN-3-ONE; NORGESTON; 17ALPH…	LEVONORGESTREL	Hormone therapy	AR; ESR1; PGR; SRD5A1	PRISM	0.47	0.4																	sig-20919	AZD5582	AZD5582	Pro-apoptotic agent	BIRC2; BIRC3; XIAP	GDSC	0.52	-0.78
sig-20915	LUMINESPIB	LUMINESPIB	HSP inhibitor	HSP90AA1	GDSC	0.46	0.4																	sig-20915	LUMINESPIB	LUMINESPIB	HSP inhibitor	HSP90AA1	GDSC	0.46	-0.78
sig-21229	HESPERADIN	HESPERADIN	Cell cycle arrest; Aurora kinase inhibitor	AURKB	PRISM	0.45	0.4																	sig-21151	(8R,9S,10R,13S,14S,17R)-13-ETHYL-17-ETHYNYL-17-HYDROXY- 1,2,6,7,8,9,10,11,12,13,14,15,16, 17- TETRADECAHYDROCYCLOPENTA[A] PHENANTHREN-3-ONE; MICROLUTON; LEVONELLE; 17-ETHYNYL-18-METHYL-19-NORTESTOSTERONE; POSTINOR; NEOGEST; (-)-13-ETHYL-17-HYDROXY-18,19-DINOR-17ALPHA-PREGN-4-EN-20-YN-3-ONE; D(-)-NORGESTREL; LEVONORGESTREL; 13-ETHYL-17-ALPHA-ETHYNYL-17-BETA-HYDROXY-4-GONEN-3-ONE; NORGESTON; 17ALPH…	LEVONORGESTREL	Hormone therapy	AR; ESR1; PGR; SRD5A1	PRISM	0.47	-0.77
sig-21462	SELUMETINIB:VORINOSTAT (8:1 MOL/MOL)	SELUMETINIB:VORINOSTAT (8:1 MOL/MOL)	Chromatin agent; Combination drug; MAPK inhibitor	HDAC1; HDAC2; HDAC3; HDAC6; HDAC8; MAP2K1; MAP2K2	CTRP	0.43	0.38																	sig-21462	SELUMETINIB:VORINOSTAT (8:1 MOL/MOL)	SELUMETINIB:VORINOSTAT (8:1 MOL/MOL)	Chromatin agent; Combination drug; MAPK inhibitor	HDAC1; HDAC2; HDAC3; HDAC6; HDAC8; MAP2K1; MAP2K2	CTRP	0.43	-0.75
																								sig-21058	KU 0060648	KU 0060648	DNA damage response inhibitor	PRKDC	CTRP	0.57	-0.73
																								sig-20974	TRIPTOLIDE	TRIPTOLIDE	Transcription inhibitor	RELA	CTRP	0.54	-0.73

## Sheet: sTable10
lumimal TC0 high sensitive drugs								lumimal TC1 high sensitive drugs								lumimal TC2 high sensitive drugs								lumimal TC3 high sensitive drugs
ID	drugs	preferred.drug.names	MoAs	targets	studies	switch.point.0	residuals.mean	ID	drugs	preferred.drug.names	MoAs	targets	studies	switch.point.1	residuals.mean	ID	drugs	preferred.drug.names	MoAs	targets	studies	switch.point.2	residuals.mean	ID	drugs	preferred.drug.names	MoAs	targets	studies	switch.point.3	residuals.mean
sig-21408	GSK-J4	GSK-J4	Chromatin agent	KDM6A; KDM6B	CTRP	0.53	4.81	sig-21322	SCH-900776	SCH-900776	Cell cycle arrest; Cell cycle checkpoint inhibitor; ; CDK inhibitor	CDK2; CHEK1	PRISM	0.44	3.54	sig-20937	BANG LAI; EPIDOPHYLLOTOXIN; 4'-DEMETHYLEPIPODOPHYLLOTOXIN 9-(4,6-O-(R)-2-THENYLIDENE-BETA-D-GLUCOPYRANOSIDE); TENIPOSIDE	TENIPOSIDE	Topoisomerase inhibitor	TOP2A; TOP2B	GDSC	0.44	6.89	sig-21052	GSK525762A	GSK525762A	BET inhibitor	BRD2; BRD3; BRD4	CTRP	0.54	6.31
sig-21052	GSK525762A	GSK525762A	BET inhibitor	BRD2; BRD3; BRD4	CTRP	0.54	3.91	sig-21055	LCL-161	LCL-161	Pro-apoptotic agent	BIRC2; XIAP	PRISM	0.48	2.93	sig-20912	PEVONEDISTAT	PEVONEDISTAT	NAE inhibitor	NAE1	GDSC	0.45	6.19	sig-21054	TEMSIROLIMUS	TEMSIROLIMUS	PI3K/AKT/mTOR signaling inhibitor	MTOR	CTRP	0.43	6.04
sig-21456	JQ-1:NAVITOCLAX (2:1 MOL/MOL)	JQ-1:NAVITOCLAX (2:1 MOL/MOL)	Chromatin agent; Pro-apoptotic agent; Combination drug	BCL2; BCL2L1; BCL2L2; BRDT	CTRP	0.52	3.11	sig-20896	DASATINIB ANHYDROUS; DASATINIB (ANH.); DASATINIB; BMS DASATINIB; ANHYDROUS DASATINIB; ANH. DASATINIB; N-(2-CHLORO-6-METHYLPHENYL)-2-({6-[4-(2-HYDROXYETHYL)PIPERAZIN-1-YL]-2-METHYLPYRIMIDIN-4-YL}AMINO)-1,3-THIAZOLE-5-CARBOXAMIDE; DASATINIB (ANHYDROUS)	DASATINIB	Multi-kinase inhibitor; SRC inhibitor; EPH receptor inhibitor; KIT inhibitor; Fusion protein inhibitor; PDGFR inhibitor	ABL; ABL1; ABL2; BCR-ABL1; BLK; EPHA2; FGR; FRK; FYN; HCK; KIT; LCK; LYN; PDGFR; PDGFRB; SRC; SRMS; STAT5B; YES1	GDSC	0.59	2.84	sig-20997	WYE-125132	WYE-125132	PI3K/AKT/mTOR signaling inhibitor	MTOR	PRISM	0.47	5.69	sig-21158	I-BET151	I-BET151	BET inhibitor	BRD2; BRD3; BRD4	CTRP	0.53	5.92
sig-21158	I-BET151	I-BET151	BET inhibitor	BRD2; BRD3; BRD4	CTRP	0.53	2.87	sig-21159	GSK1070916	GSK1070916	Cell cycle arrest; Aurora kinase inhibitor	AURKA; AURKB; AURKC; CYP2D6; CYP3A4	PRISM	0.52	2.23	sig-20884	SUBEROYLANILIDE HYDROXAMIC ACID; OCTANEDIOIC ACID HYDROXYAMIDE PHENYLAMIDE; VORINOSTAT; SHH; SUBERANILOHYDROXAMIC ACID; SAHA	VORINOSTAT	Chromatin agent	HDAC1; HDAC10; HDAC11; HDAC2; HDAC3; HDAC4; HDAC5; HDAC6; HDAC7; HDAC8; HDAC9	GDSC	0.47	5.6	sig-20902	CYTOGEM; GEBINA; CELGEM; TABIN; 2'-DEOXY-2',2'-DIFLUOROCYTIDINE; 4-AMINO-1-((2R,4R,5R)-3,3-DIFLUORO-4-HYDROXY-5-(HYDROXYMETHYL)-TETRAHYDROFURAN-2-YL)PYRIMIDIN-2(1H)-ONE; GITRABIN; ACYTABIN; RIBOZAR; ONCOGEM; XTROZ; GEMCIRED; ABINE; 2',2'-DIFLUORODEOXYCYTIDINE; JEMTA; GEMCITABINE; ERIOGEM; DAPLAX; DERCIN; NALLIAN; GRAMAGEN; FOTINEX; ABINGEM; CELZAR; GEMITA; GEZT; GEMBIO	GEMCITABINE	DNA replication inhibitor	CMPK1; RRM1; RRM2; TYMS	GDSC	0.52	5.79
sig-21022	RITA	RITA	p53 activator/MDM2 inhibitor	MDM2; TP53	CTRP	0.54	2.7	sig-21216	ALPELISIB	ALPELISIB	PI3K/AKT/mTOR signaling inhibitor	PIK3CA; PIK3CB; PIK3CD; PIK3CG	PRISM	0.51	2.22	sig-20879	21,22-SECOCAMPTOTHECIN-21-OIC ACID LACTONE; CAMPTOTHECINE; (+)-CAMPTOTHECINE; 20(S)-CAMPTOTHECINE; (+)-CAMPTOTHECIN; D-CAMPTOTHECIN; (S)-(+)-CAMPTOTHECIN	CAMPTOTHECIN	Topoisomerase inhibitor; DNA replication inhibitor	TOP1	GDSC	0.5	5.51	sig-21219	RIGOSERTIB	RIGOSERTIB	PI3K/AKT/mTOR signaling inhibitor; Cell cycle arrest; PLK inhibitor	PIK3CA; PIK3CB; PLK1	PRISM	0.55	5.63
sig-21219	RIGOSERTIB	RIGOSERTIB	PI3K/AKT/mTOR signaling inhibitor; Cell cycle arrest; PLK inhibitor	PIK3CA; PIK3CB; PLK1	PRISM	0.55	2.64	sig-21294	ALVOCIDIB FREEBASE; FLAVOPIRIDOL; ALVOCIDIB	ALVOCIDIB	Cell cycle arrest; CDK inhibitor	CDK1; CDK2; CDK4; CDK6	CTRP	0.45	1.81	sig-20898	BIOTECAN; IRINOTECAN LACTONE; CAMPTO; (+)-IRINOTECAN; IRINOTECAN	IRINOTECAN	Topoisomerase inhibitor; DNA replication inhibitor	TOP1	GDSC	0.46	5.45	sig-21026	BRD-K01737880	BRD-K01737880			CTRP	0.55	5.61
sig-21443	JQ-1:UNC0638 (2:1 MOL/MOL)	JQ-1:UNC0638 (2:1 MOL/MOL)	Combination drug; Chromatin agent	BRDT; EHMT1; EHMT2	CTRP	0.54	2.42	sig-21087	MOCETINOSTAT	MOCETINOSTAT	Chromatin agent	HDAC1; HDAC11; HDAC2; HDAC3	PRISM	0.5	1.79	sig-20881	CYTOSINE ARABINOSIDE; ARA-C; CYTOSINE-1-BETA-D-ARABINOFURANOSIDE; CYTOSAR-U; CYTOSINE-螔-D-ARABINOFURANOSIDE; 4-AMINO-1-BETA-D-ARABINOFURANOSYL-2(1H)-PYRIMIDINONE; CYTARABINE; 1-BETA-D-ARABINOFURANOSYLCYTOSINE	CYTARABINE	DNA damaging agent; DNA replication inhibitor		GDSC	0.51	5.43	sig-21333	N-(2-AMINOPHENYL)-4-(N-(PYRIDIN-3-YLMETHOXYCARBONYL)AMINOMETHYL)BENZAMIDE; N-[[4-[(2-AMINOANILINO)-OXOMETHYL]PHENYL]METHYL]CARBAMIC ACID 3-PYRIDINYLMETHYL ESTER; ENTINOSTAT	ENTINOSTAT	Chromatin agent	HDAC1; HDAC2; HDAC3; HDAC6; HDAC8	CTRP	0.52	5.59
sig-20949	MERACTINOMYCIN; ACTD; ACTINOMYCIN C1; LYOVAC COSMEGEN; ACTINOMYCIN IV; 2-AMINO-N,N'-BIS(HEXADECAHYDRO-2,5,9-TRIMETHYL-6,13-BIS(1-METHYLETHYL)-1,4,7,11,14-PENTAOXO-1H-PYRROLO(2,1-I)(1,4,7,10,13)OXATETRA-AZACYCLOHEXADECIN-10-YL)-4,6-DIMETHYL-3-OXO-3H-PHENOXAZINE-1,9-DICARBOXAMIDE; DACTINOMYCIN; ACTINOMYCIN D	DACTINOMYCIN	Transcription inhibitor	RNApol	GDSC	0.47	2.42	sig-21339	IXAZOMIB; NINLARO	IXAZOMIB	Ubiquitin-proteasome system inhibitor		PRISM	0.46	1.48	sig-21133	CD-437	CD-437	Retinoid acid receptor agonist; Pro-apoptotic agent	RARG	CTRP	0.51	5.27	sig-21408	GSK-J4	GSK-J4	Chromatin agent	KDM6A; KDM6B	CTRP	0.53	5.53
sig-20972	NUTLIN-3	NUTLIN-3	p53 activator/MDM2 inhibitor	MDM2	CTRP	0.53	2.29	sig-20903	SB505124	SB505124	TGFbeta receptor inhibitor	ACVR1B; ACVR1C; TGFBR1	GDSC	0.52	1.37	sig-21097	MUBRITINIB	MUBRITINIB	ErbB inhibitor	EGFR; ERBB2	PRISM	0.46	5.2	sig-20972	NUTLIN-3	NUTLIN-3	p53 activator/MDM2 inhibitor	MDM2	CTRP	0.53	4.78
sig-21333	N-(2-AMINOPHENYL)-4-(N-(PYRIDIN-3-YLMETHOXYCARBONYL)AMINOMETHYL)BENZAMIDE; N-[[4-[(2-AMINOANILINO)-OXOMETHYL]PHENYL]METHYL]CARBAMIC ACID 3-PYRIDINYLMETHYL ESTER; ENTINOSTAT	ENTINOSTAT	Chromatin agent	HDAC1; HDAC2; HDAC3; HDAC6; HDAC8	CTRP	0.52	2.15	sig-21267	4-(3'-CHLORO-4'-FLUOROANILINO)-7-METHOXY-6-(3-MORPHOLINOPROPOXY)QUINAZOLINE; N-(3-CHLORO-4-FLUOROPHENYL)-7-METHOXY-6-(3-(4-MORPHOLINYL)PROPOXY)-4-QUINAZOLINAMINE; GEFITINIB	GEFITINIB	ErbB inhibitor	AKT1; EGFR	PRISM	0.51	1.34	sig-20907	TALAZOPARIB	TALAZOPARIB	PARP inhibitor	PARP1; PARP2	GDSC	0.44	4.91	sig-21390	EXATECAN-MESYLATE	EXATECAN-MESYLATE	DNA replication inhibitor; Topoisomerase inhibitor	TOP1	PRISM	0.53	4.78
sig-21105	SKI-II	SKI-II	Lipid metabolism inhibitor; Sphingolipid metabolism inhibitor	SPHK1	PRISM	0.58	2.07	sig-21182	7-HYDROXYSTAUROSPORINE	7-HYDROXYSTAUROSPORINE	Cell cycle arrest; CDK inhibitor; Cell cycle checkpoint inhibitor; PKC inhibitor	CHEK1; MARK3; PDPK1	PRISM	0.55	1.32	sig-21265	BARASERTIB-HQPA	BARASERTIB-HQPA	Cell cycle arrest; Aurora kinase inhibitor	AURKB	PRISM	0.41	4.9	sig-21344	SUBEROYLANILIDE HYDROXAMIC ACID; OCTANEDIOIC ACID HYDROXYAMIDE PHENYLAMIDE; VORINOSTAT; SHH; SUBERANILOHYDROXAMIC ACID; SAHA	VORINOSTAT	Chromatin agent	HDAC1; HDAC10; HDAC11; HDAC2; HDAC3; HDAC4; HDAC5; HDAC6; HDAC7; HDAC8; HDAC9	CTRP	0.53	4.54
sig-21054	TEMSIROLIMUS	TEMSIROLIMUS	PI3K/AKT/mTOR signaling inhibitor	MTOR	CTRP	0.43	1.97	sig-21302	AZD-8055	AZD8055	PI3K/AKT/mTOR signaling inhibitor	MTOR; mTORC1; mTORC2	PRISM	0.47	1.29	sig-20880	LEMBLASTINE; WEIBAODING; VINCALEUKOBLASTINE; ONCOSTIN; XINTOPROST; VINKO; VELBAN; VELBASTIN; VINBLASTINE; VINBLASIN; CYTOBLASTIN; VELBE; VINBLASTIN; BLASTIVIN	VINBLASTINE	Microtubule agent		GDSC	0.51	4.89	sig-21022	RITA	RITA	p53 activator/MDM2 inhibitor	MDM2; TP53	CTRP	0.54	4.53
sig-20902	CYTOGEM; GEBINA; CELGEM; TABIN; 2'-DEOXY-2',2'-DIFLUOROCYTIDINE; 4-AMINO-1-((2R,4R,5R)-3,3-DIFLUORO-4-HYDROXY-5-(HYDROXYMETHYL)-TETRAHYDROFURAN-2-YL)PYRIMIDIN-2(1H)-ONE; GITRABIN; ACYTABIN; RIBOZAR; ONCOGEM; XTROZ; GEMCIRED; ABINE; 2',2'-DIFLUORODEOXYCYTIDINE; JEMTA; GEMCITABINE; ERIOGEM; DAPLAX; DERCIN; NALLIAN; GRAMAGEN; FOTINEX; ABINGEM; CELZAR; GEMITA; GEZT; GEMBIO	GEMCITABINE	DNA replication inhibitor	CMPK1; RRM1; RRM2; TYMS	GDSC	0.52	1.88	sig-21044	GSK1838705A	GSK1838705A	IGF1R signaling inhibitor; ALK inhibitor	ALK; IGF1R; INSR; RPS6KA1	PRISM	0.53	1.27	sig-20902	CYTOGEM; GEBINA; CELGEM; TABIN; 2'-DEOXY-2',2'-DIFLUOROCYTIDINE; 4-AMINO-1-((2R,4R,5R)-3,3-DIFLUORO-4-HYDROXY-5-(HYDROXYMETHYL)-TETRAHYDROFURAN-2-YL)PYRIMIDIN-2(1H)-ONE; GITRABIN; ACYTABIN; RIBOZAR; ONCOGEM; XTROZ; GEMCIRED; ABINE; 2',2'-DIFLUORODEOXYCYTIDINE; JEMTA; GEMCITABINE; ERIOGEM; DAPLAX; DERCIN; NALLIAN; GRAMAGEN; FOTINEX; ABINGEM; CELZAR; GEMITA; GEZT; GEMBIO	GEMCITABINE	DNA replication inhibitor	CMPK1; RRM1; RRM2; TYMS	GDSC	0.52	4.7	sig-21443	JQ-1:UNC0638 (2:1 MOL/MOL)	JQ-1:UNC0638 (2:1 MOL/MOL)	Combination drug; Chromatin agent	BRDT; EHMT1; EHMT2	CTRP	0.54	4.43
sig-20990	CYCLOSPORIN; VERKAZIA; CYCLOSPORIN A; CYCLOSPORINE; CYA; CICLOSPORIN; CSA; SANGCYA	CICLOSPORIN	Immunosuppressive agent	PPID	CTRP	0.53	1.86	sig-21321	PAZOPANIB	PAZOPANIB	FLT3 inhibitor; Multi-kinase inhibitor; PDGFR inhibitor; KIT inhibitor; VEGFR inhibitor	CSF1R; FGF1; FGFR1; FGFR3; FLT1; FLT3; FLT4; ITK; KDR; KIT; PDGFRA; PDGFRB; SH2B3	PRISM	0.56	1.18	sig-21050	DANUSERTIB	DANUSERTIB	Cell cycle arrest; Aurora kinase inhibitor	AURKA; AURKB; AURKC; FGFR1; NTRK1; RET; SLK	PRISM	0.46	4.6	sig-21017	OLIGOMYCIN A	OLIGOMYCIN A	ATP synthase inhibitor	ATP5L2	CTRP	0.58	4.36
sig-21115	N-(4-CHLORO-3-(TRIFLUOROMETHYL)PHENYL)-N'-(4-(2-(N-METHYLCARBAMOYL)-4-PYRIDYLOXY)PHENYL)UREA; SORAFENIB; 4-(4-((((4-CHLORO-3-(TRIFLUOROMETHYL)PHENYL)AMINO)CARBONYL)AMINO)PHENOXY)-N-METHYL-2-PYRIDINECARBOXAMIDE	SORAFENIB	Multi-kinase inhibitor; RAF inhibitor; VEGFR inhibitor	BRAF; FLT3; KDR; RAF1	CTRP	0.59	1.85	sig-21296	GDC-0152	GDC-0152	Pro-apoptotic agent	BIRC2; BIRC3; BIRC7; XIAP	PRISM	0.59	1.15	sig-21287	PEVONEDISTAT	PEVONEDISTAT	NAE inhibitor	NAE1	CTRP	0.45	4.54	sig-20879	21,22-SECOCAMPTOTHECIN-21-OIC ACID LACTONE; CAMPTOTHECINE; (+)-CAMPTOTHECINE; 20(S)-CAMPTOTHECINE; (+)-CAMPTOTHECIN; D-CAMPTOTHECIN; (S)-(+)-CAMPTOTHECIN	CAMPTOTHECIN	Topoisomerase inhibitor; DNA replication inhibitor	TOP1	GDSC	0.5	4.28
sig-21335	CRIZOTINIB; (R)-CRIZOTINIB	CRIZOTINIB	Multi-kinase inhibitor; ALK inhibitor; MET inhibitor	ALK; MET	CTRP	0.55	1.78	sig-21400	INGENOL 3-ANGELATE; 3-INGENYL ANGELATE; PICATO GEL; INGENOL MEBUTATE; 3-ANGELOYLINGENOL	INGENOL-MEBUTATE	PKC activator	PRKCA; PRKCB; PRKCD; PRKCE; PRKCG	PRISM	0.55	1.13	sig-21333	N-(2-AMINOPHENYL)-4-(N-(PYRIDIN-3-YLMETHOXYCARBONYL)AMINOMETHYL)BENZAMIDE; N-[[4-[(2-AMINOANILINO)-OXOMETHYL]PHENYL]METHYL]CARBAMIC ACID 3-PYRIDINYLMETHYL ESTER; ENTINOSTAT	ENTINOSTAT	Chromatin agent	HDAC1; HDAC2; HDAC3; HDAC6; HDAC8	CTRP	0.52	4.53	sig-21277	DIPHENYLENEIODONIUM	DIPHENYLENEIODONIUM	ROS/RNS modulator; ROS/RNS inhibitor	NOS2; NOS3	PRISM	0.56	4.14
sig-21026	BRD-K01737880	BRD-K01737880			CTRP	0.55	1.67	sig-21193	DASATINIB ANHYDROUS; DASATINIB (ANH.); DASATINIB; BMS DASATINIB; ANHYDROUS DASATINIB; ANH. DASATINIB; N-(2-CHLORO-6-METHYLPHENYL)-2-({6-[4-(2-HYDROXYETHYL)PIPERAZIN-1-YL]-2-METHYLPYRIMIDIN-4-YL}AMINO)-1,3-THIAZOLE-5-CARBOXAMIDE; DASATINIB (ANHYDROUS)	DASATINIB	Multi-kinase inhibitor; SRC inhibitor; EPH receptor inhibitor; KIT inhibitor; Fusion protein inhibitor; PDGFR inhibitor	ABL; ABL1; ABL2; BCR-ABL1; BLK; EPHA2; FGR; FRK; FYN; HCK; KIT; LCK; LYN; PDGFR; PDGFRB; SRC; SRMS; STAT5B; YES1	CTRP	0.56	1.11	sig-21375	TALTOBULIN	TALTOBULIN	Microtubule agent		PRISM	0.47	4.49	sig-21310	SNX-2112	SNX-2112	HSP inhibitor	HSP90AA1; HSP90B1	PRISM	0.57	4.08
sig-21020	BRD-A94377914	BRD-A94377914	Chromatin agent	HDAC1; HDAC2; HDAC3; HDAC6; HDAC8	CTRP	0.51	1.64	sig-20893	PICTILISIB	PICTILISIB	PI3K/AKT/mTOR signaling inhibitor	PIK3CA; PIK3CD	GDSC	0.52	1.03	sig-20940	ALCRIST; 22-OXOVINCALEUKOBLASTIN; TEVACRISTIN; ONCOCRISTIN; VINCES; ALCAVIXIN; VINCRISTINE; ONCOVIN; VINRACINE; VINCRISIN; 22-OXOVINCALEUKOBLASTINE; ONCRIVIN; VINLON; CYTOCRISTIN; VINCRISTIN; VINCRISUL; SINDOVIN; LEUROCRISTINE; CITOMID	VINCRISTINE	Microtubule agent	TUBA4A; TUBB	GDSC	0.46	4.47	sig-21456	JQ-1:NAVITOCLAX (2:1 MOL/MOL)	JQ-1:NAVITOCLAX (2:1 MOL/MOL)	Chromatin agent; Pro-apoptotic agent; Combination drug	BCL2; BCL2L1; BCL2L2; BRDT	CTRP	0.52	4.03
sig-21344	SUBEROYLANILIDE HYDROXAMIC ACID; OCTANEDIOIC ACID HYDROXYAMIDE PHENYLAMIDE; VORINOSTAT; SHH; SUBERANILOHYDROXAMIC ACID; SAHA	VORINOSTAT	Chromatin agent	HDAC1; HDAC10; HDAC11; HDAC2; HDAC3; HDAC4; HDAC5; HDAC6; HDAC7; HDAC8; HDAC9	CTRP	0.53	1.59	sig-21206	EPOTHILONE-D	EPOTHILONE-D	Microtubule agent	TUBA1A; TUBA1B; TUBA1C; TUBA3C; TUBA4A; TUBA8; TUBB; TUBB1; TUBB3; TUBB4A; TUBB4B	PRISM	0.51	1.02	sig-21277	DIPHENYLENEIODONIUM	DIPHENYLENEIODONIUM	ROS/RNS modulator; ROS/RNS inhibitor	NOS2; NOS3	PRISM	0.56	4.38	sig-21133	CD-437	CD-437	Retinoid acid receptor agonist; Pro-apoptotic agent	RARG	CTRP	0.51	3.97
sig-21428	VORINOSTAT:NAVITOCLAX (4:1 MOL/MOL)	VORINOSTAT:NAVITOCLAX (4:1 MOL/MOL)	Chromatin agent; Pro-apoptotic agent; Combination drug	BCL2; BCL2L1; BCL2L2; HDAC1; HDAC2; HDAC3; HDAC6; HDAC8	CTRP	0.56	1.55	sig-21179	ONCRASIN-1	ONCRASIN-1	Pro-apoptotic agent		PRISM	0.53	0.98	sig-21210	OTS167	OTS167	MELK inhibitor	MELK	PRISM	0.45	4.37	sig-20881	CYTOSINE ARABINOSIDE; ARA-C; CYTOSINE-1-BETA-D-ARABINOFURANOSIDE; CYTOSAR-U; CYTOSINE-螔-D-ARABINOFURANOSIDE; 4-AMINO-1-BETA-D-ARABINOFURANOSYL-2(1H)-PYRIMIDINONE; CYTARABINE; 1-BETA-D-ARABINOFURANOSYLCYTOSINE	CYTARABINE	DNA damaging agent; DNA replication inhibitor		GDSC	0.51	3.96
sig-21017	OLIGOMYCIN A	OLIGOMYCIN A	ATP synthase inhibitor	ATP5L2	CTRP	0.58	1.51	sig-21031	CHIR-124	CHIR-124	Cell cycle arrest; Cell cycle checkpoint inhibitor	CHEK1	PRISM	0.54	0.93	sig-20936	9-[(DIMETHYLAMINO)METHYL]-10-HYDROXY-(4S)-CAMPTOTHECIN; TOPOTECAN	TOPOTECAN	DNA replication inhibitor; Topoisomerase inhibitor; DNA damaging agent	TOP1	GDSC	0.47	4.16	sig-21287	PEVONEDISTAT	PEVONEDISTAT	NAE inhibitor	NAE1	CTRP	0.45	3.9
sig-21150	BMS-536924	BMS-536924	IGF1R signaling inhibitor	IGF1R; INSR	CTRP	0.55	1.45	sig-20919	AZD5582	AZD5582	Pro-apoptotic agent	BIRC2; BIRC3; XIAP	GDSC	0.46	0.93	sig-20949	MERACTINOMYCIN; ACTD; ACTINOMYCIN C1; LYOVAC COSMEGEN; ACTINOMYCIN IV; 2-AMINO-N,N'-BIS(HEXADECAHYDRO-2,5,9-TRIMETHYL-6,13-BIS(1-METHYLETHYL)-1,4,7,11,14-PENTAOXO-1H-PYRROLO(2,1-I)(1,4,7,10,13)OXATETRA-AZACYCLOHEXADECIN-10-YL)-4,6-DIMETHYL-3-OXO-3H-PHENOXAZINE-1,9-DICARBOXAMIDE; DACTINOMYCIN; ACTINOMYCIN D	DACTINOMYCIN	Transcription inhibitor	RNApol	GDSC	0.47	4.06	sig-21097	MUBRITINIB	MUBRITINIB	ErbB inhibitor	EGFR; ERBB2	PRISM	0.46	3.85
sig-21197	NVP-TAE684	NVP-TAE684	Fusion protein inhibitor; ALK inhibitor	ALK; NPM-ALK	CTRP	0.51	1.41	sig-21147	DFBA; DIFLUPREDNATE; DIFLUOROPREDNISOLONE BUTYRATE ACETATE	DIFLUPREDNATE	Glucocorticoid receptor agonist	NR3C1	PRISM	0.52	0.91	sig-20954	TELOMERASE INHIBITOR IX	TELOMERASE INHIBITOR IX	Telomerase inhibitor	Telomerase	GDSC	0.57	3.99	sig-20898	BIOTECAN; IRINOTECAN LACTONE; CAMPTO; (+)-IRINOTECAN; IRINOTECAN	IRINOTECAN	Topoisomerase inhibitor; DNA replication inhibitor	TOP1	GDSC	0.46	3.82
sig-21246	COMBRESTATIN A4; 2'-DEOXYCOMBRETASTATIN A1; COMBRETASTATIN 4; COMBRETASTATIN A-4	COMBRETASTATIN-A-4	Microtubule agent		PRISM	0.58	1.39	sig-21252	PIRINASE; FLUNASE; SERETIDE; NASOFAN; FLIXONASE; FLOVENTHFA; EZICAS; FLUTICASONE PROPIONATE; FLIXOTIDE	FLUTICASONE-PROPIONATE	Glucocorticoid receptor agonist	NR3C1; NR3C2; PGR; PLA2G4A	PRISM	0.48	0.9	sig-21414	GENZ-644282	GENZ-644282	DNA replication inhibitor; Topoisomerase inhibitor	TOP1	PRISM	0.44	3.88	sig-21290	EPO B; EPOTHILONE B; PATUPILONE; (鈭?-EPOTHILONE B	EPOTHILONE-B	Microtubule agent	TUBA1A; TUBA1B; TUBA1C; TUBA3C; TUBA4A; TUBA8; TUBB; TUBB1; TUBB3; TUBB4A; TUBB4B	PRISM	0.52	3.68
sig-21310	SNX-2112	SNX-2112	HSP inhibitor	HSP90AA1; HSP90B1	PRISM	0.57	1.32	sig-21077	DINACICLIB	DINACICLIB	Cell cycle arrest; CDK inhibitor	CDK1; CDK2; CDK5; CDK9	CTRP	0.51	0.89	sig-21025	TAK-901	TAK-901	Aurora kinase inhibitor; Cell cycle arrest	AURKB	PRISM	0.41	3.74	sig-20884	SUBEROYLANILIDE HYDROXAMIC ACID; OCTANEDIOIC ACID HYDROXYAMIDE PHENYLAMIDE; VORINOSTAT; SHH; SUBERANILOHYDROXAMIC ACID; SAHA	VORINOSTAT	Chromatin agent	HDAC1; HDAC10; HDAC11; HDAC2; HDAC3; HDAC4; HDAC5; HDAC6; HDAC7; HDAC8; HDAC9	GDSC	0.47	3.65
sig-21420	NAVITOCLAX:SORAFENIB (1:1 MOL/MOL)	NAVITOCLAX:SORAFENIB (1:1 MOL/MOL)	Combination drug; Pro-apoptotic agent; Multi-kinase inhibitor	BCL2; BCL2L1; BCL2L2; BRAF; FLT3; KDR; RAF1	CTRP	0.49	1.31	sig-21071	TRAMETINIB	TRAMETINIB	MAPK inhibitor	MAP2K1; MAP2K2; MEK1; MEK2	PRISM	0.5	0.89	sig-20958	VINELBINE; VINORGEN; NAVIREL; FILCRIN; VILNE; 5'-NORANHYDROVINBLASTINE; NAVILDEZ; NAVELBIN; BENDARELBIN; VINOTEL; VINOREL; VINORAYNE; NEOCITEC; ZINAVIN; RENOVEL; EBERELBIN; VINORELBINE; EUROVINORELBIN; RIBORELBIN; NAVIN; EUNEXON	VINORELBINE	Microtubule agent	TUBA1A; TUBA1B; TUBA1C; TUBA3C; TUBA3D; TUBA3E; TUBA4A; TUBB; TUBB1; TUBB2A; TUBB2B; TUBB3; TUBB4A; TUBB4B; TUBB6; TUBB8	GDSC	0.45	3.68	sig-21061	SALAZOPYRIN EN-TABS; SALICYLAZOSULFAPYRIDINE; REUMAZIN; WEILIUFEN; 2-HYDROXY-5-[4-(PYRIDIN-2-YLSULFAMOYL)-PHENYLAZO]-BENZOIC ACID; SALAZOPYRIN EN; EMINAPYRIN; AZOPYRIN; ASASURFAN; 4-(PYRIDYL-2-AMIDOSULFONYL)-3'-CARBOXY-4'-HYDROXYAZOBENZENE; LAZAFIN; SALAZOPRIN; SULFASALAZINE; 5-(4-(2-PYRIDYLSULFAMOYL)PHENYLAZO)-2-HYDROXYBENZOIC ACID; SALASOPYRINE; FLOGOSTOP; DISALAZIN; SULCOLON; IWATA; SAAZ; 5-((…	SULFASALAZINE	Cyclooxygenase inhibitor	ACAT1; ALOX5; CHUK; IKBKB; PLA2G1B; PPARG; PTGS1; PTGS2; SLC46A1; SLC7A11; TBXAS1	PRISM	0.56	3.54
sig-21437	NAVITOCLAX:PIPERLONGUMINE (1:1 MOL/MOL)	NAVITOCLAX:PIPERLONGUMINE (1:1 MOL/MOL)	Combination drug; Pro-apoptotic agent; ROS/RNS modulator	BCL2; BCL2L1; BCL2L2	CTRP	0.54	1.26	sig-21106	NVP-TAE226	NVP-TAE226	PTK inhibitor	PTK2	PRISM	0.46	0.88	sig-21390	EXATECAN-MESYLATE	EXATECAN-MESYLATE	DNA replication inhibitor; Topoisomerase inhibitor	TOP1	PRISM	0.53	3.65	sig-21338	MLN2238	MLN2238	Ubiquitin-proteasome system inhibitor	PSMB5	CTRP	0.49	3.52
sig-20982	NECTROLIDE; SYNERGISIDIN; (+)-BREFELDIN A; DECUMBIN; CYANEIN; ASCOTOXIN	BREFELDIN A	Protein trafficking inhibitor; CRISPR/Cas9 activator	ARF1	CTRP	0.51	1.26	sig-21195	1-HYDROXYCHOLECALCIFEROL; 1螒-HYDROXYVITAMIN D3; 9,10-SECOCHOLESTA-5,7,10(19)-TRIENE-1螒,3螔-DIOL; ALFACALCIDOL; 1ALPHA-HYDROXYCHOLECALCIFEROL; 1螒-HYDROXY-VITAMIN D3; (5Z,7E)-9,10-SECO-5,7,10(19)-CHOLESTATRIEN-1螒,3螔-DIOL; ALSIODOL; ONE ALPHA; 1螒-HYDROXYCHOLECALCIFEROL	ALFACALCIDOL	Vitamin D receptor agonist	CYP27B1; VDR	PRISM	0.49	0.87	sig-20944	SABUTOCLAX	SABUTOCLAX	Pro-apoptotic agent	BCL2L1; BCL2; BFL1; MCL1	GDSC	0.5	3.64	sig-21317	BENZETHONIUM	BENZETHONIUM	Ion channel blocker	SCN10A	PRISM	0.58	3.48
sig-21290	EPO B; EPOTHILONE B; PATUPILONE; (鈭?-EPOTHILONE B	EPOTHILONE-B	Microtubule agent	TUBA1A; TUBA1B; TUBA1C; TUBA3C; TUBA4A; TUBA8; TUBB; TUBB1; TUBB3; TUBB4A; TUBB4B	PRISM	0.52	1.25	sig-21166	21,22-SECOCAMPTOTHECIN-21-OIC ACID LACTONE; CAMPTOTHECINE; (+)-CAMPTOTHECINE; 20(S)-CAMPTOTHECINE; (+)-CAMPTOTHECIN; D-CAMPTOTHECIN; (S)-(+)-CAMPTOTHECIN	CAMPTOTHECIN	Topoisomerase inhibitor; DNA replication inhibitor	TOP1	PRISM	0.51	0.84	sig-21111	GDC-0980	GDC-0980	PI3K/AKT/mTOR signaling inhibitor	FGR; MAP3K9; MTOR; PIK3CA; PIK3CB; PIK3CD; PIK3CG; SYK	PRISM	0.52	3.63	sig-20943	DIHYDROROTENONE	DIHYDROROTENONE	Mitochondrial inhibitor		GDSC	0.46	3.45
sig-21108	KW-2449	KW-2449	Aurora kinase inhibitor; FLT3 inhibitor; Multi-kinase inhibitor; ABL inhibitor	ABL; AURKA; FLT3	CTRP	0.53	1.24	sig-20899	BMS-536924	BMS-536924	IGF1R signaling inhibitor	IGF1R; INSR	GDSC	0.57	0.82	sig-21291	EVP4593	EVP4593	NFkB signaling inhibitor		PRISM	0.44	3.57	sig-21426	OXALATOPLATIN; OXALIPLATIN; DIAMINOCYCLOHEXANE OXALATOPLATINUM; OXALATOPLATINUM; L-OHP	OXALIPLATIN	DNA replication inhibitor; DNA damaging agent		CTRP	0.53	3.44
sig-21034	SU11274	SU11274	MET inhibitor	MET	CTRP	0.44	1.22	sig-21174	N-(2-{[2-(DIMETHYLAMINO)ETHYL](METHYL)AMINO}-4-METHOXY-5-{[4-(1-METHYL-1H-INDOL-3-YL)PYRIMIDIN-2-YL]AMINO}PHENYL)PROP-2-ENAMIDE; OSIMERTINIB; MERELETINIB	OSIMERTINIB	ErbB inhibitor	EGFR	PRISM	0.57	0.81	sig-21244	PHA-848125	PHA-848125	Cell cycle arrest; CDK inhibitor	CDK2; CDK4; CDK7; NTRK1	PRISM	0.52	3.5	sig-21424	TANESPIMYCIN:BORTEZOMIB (250:1 MOL/MOL)	TANESPIMYCIN:BORTEZOMIB (250:1 MOL/MOL)	Combination drug; HSP inhibitor; Ubiquitin-proteasome system inhibitor	HSP90AA1; PSMB1; PSMB2; PSMB5; PSMD1; PSMD2	CTRP	0.51	3.43
sig-21261	TIPIFARNIB-P1	TIPIFARNIB-P1	Farnesyltransferase inhibitor	FNTA	CTRP	0.44	1.21	sig-21325	PITAVASTATIN	PITAVASTATIN	HMGCR inhibitor	HMGCR	PRISM	0.56	0.79	sig-21255	NEOPELTOLIDE	NEOPELTOLIDE	Cellular respiration inhibitor		CTRP	0.41	3.48	sig-21149	BRD-K34222889	BRD-K34222889	Piperlongumine analog		CTRP	0.49	3.43
sig-21419	SIROLIMUS:BORTEZOMIB (250:1 MOL/MOL)	SIROLIMUS:BORTEZOMIB (250:1 MOL/MOL)	Combination drug; PI3K/AKT/mTOR signaling inhibitor; Ubiquitin-proteasome system inhibitor	MTOR; PSMB1; PSMB2; PSMB5; PSMD1; PSMD2	CTRP	0.53	1.2	sig-21122	GSK2110183	GSK2110183	PI3K/AKT/mTOR signaling inhibitor	AKT1; AKT2; AKT3	PRISM	0.48	0.76	sig-21241	BESTATIN; UBENIMEX	UBENIMEX	Leukotriene synthesis inhibitor; Proteolysis inhibitor	LTA4H; RNPEP	PRISM	0.44	3.44	sig-21346	TANESPIMYCIN; 17AAG	TANESPIMYCIN	HSP inhibitor	HSP90AA1	CTRP	0.56	3.41
sig-21444	JQ-1:VORINOSTAT (2:1 MOL/MOL)	JQ-1:VORINOSTAT (2:1 MOL/MOL)	Combination drug; Chromatin agent	BRDT; HDAC1; HDAC2; HDAC3; HDAC6; HDAC8	CTRP	0.47	1.2	sig-21003	LGX818	LGX818	RAF inhibitor	BRAF	PRISM	0.52	0.73	sig-21186	ANGUIDINE	ANGUIDINE	Protein synthesis inhibitor	SLC5A1	PRISM	0.47	3.34	sig-20948	ABT737	ABT737	Pro-apoptotic agent	BCL-B; BCL-W; BCL2L1; BCL2; BFL1	GDSC	0.45	3.33
sig-21175	SUNITINIB	SUNITINIB	Multi-kinase inhibitor; PDGFR inhibitor; KIT inhibitor; VEGFR inhibitor; FLT3 inhibitor	FLT1; FLT3; KDR; KIT; PDGFRA; PDGFRB	CTRP	0.42	1.2	sig-21035	PF-477736	PF-477736	Cell cycle arrest; Cell cycle checkpoint inhibitor	CHEK1; CHEK2	PRISM	0.57	0.71	sig-21122	GSK2110183	GSK2110183	PI3K/AKT/mTOR signaling inhibitor	AKT1; AKT2; AKT3	PRISM	0.48	3.31	sig-21255	NEOPELTOLIDE	NEOPELTOLIDE	Cellular respiration inhibitor		CTRP	0.41	3.32
sig-21211	NEURONAL DIFFERENTIATION INDUCER III	NEURONAL DIFFERENTIATION INDUCER III	Neuronal differentiation inducer		CTRP	0.57	1.19	sig-21303	1-[(3R)-3-[4-AMINO-3-(4-PHENOXYPHENYL)-1H-PYRAZOLO[3,4-D]PYRIMIDIN-1-YL]PIPERIDIN-1-YL]PROP-2-EN-1-ONE; IBRUTINIB	IBRUTINIB	BTK inhibitor	BTK	CTRP	0.54	0.71	sig-20911	EPIRUBICIN; EPIRUBICIN EBEWE; 4'-EPIADRIAMYCIN; EPIADRIAMYCIN; PHARMORUBICIN	EPIRUBICIN	Topoisomerase inhibitor; DNA replication inhibitor; DNA damaging agent	CHD1; TOP2A	GDSC	0.45	3.3	sig-21015	MYRIOCIN	MYRIOCIN	Sphingolipid metabolism inhibitor; Lipid metabolism inhibitor	SPTLC1; SPTLC2; SPTLC3	CTRP	0.44	3.24
sig-21313	CH-55	CH-55	Retinoid acid receptor agonist	RARA; RARB; RARG	CTRP	0.49	1.19	sig-21226	SELUMETINIB	SELUMETINIB	MAPK inhibitor	MAP2K1; MAP2K2; MEK1; MEK2	PRISM	0.52	0.71	sig-20932	IGF1R_3801	IGF1R_3801	IGF1R signaling inhibitor	IGF1R	GDSC	0.55	3.29	sig-21111	GDC-0980	GDC-0980	PI3K/AKT/mTOR signaling inhibitor	FGR; MAP3K9; MTOR; PIK3CA; PIK3CB; PIK3CD; PIK3CG; SYK	PRISM	0.52	3.16
sig-21040	MERCK60	MERCK60	Chromatin agent	HDAC1; HDAC2	CTRP	0.51	1.18	sig-20967	N-DEBENZOYL-N-(TERT-BUTOXYCARBONYL)-10-DEACETYLTAXOL; DOCETAXEL ANHYDROUS; TXL; DOCETAXEL; N-DEBENZOYL-N-(TERT-BUTOXYCARBONYL)-10-DEACETYLPACLITAXEL	DOCETAXEL	Microtubule agent	BCL2; MAP2; MAP4; MAPT; NR1I2; TUBB; TUBB1	CTRP	0.52	0.71	sig-21184	MPI-0479605	MPI-0479605	TTK inhibitor; Cell cycle arrest	TTK	PRISM	0.52	3.22	sig-21312	KPT-185	KPT-185	Nucleocytoplasmic transport inhibitor	XPO1	PRISM	0.54	3.13
sig-21461	UNC0638:NAVITOCLAX (1:1 MOL/MOL)	UNC0638:NAVITOCLAX (1:1 MOL/MOL)	Combination drug; Chromatin agent; Pro-apoptotic agent	BCL2; BCL2L1; BCL2L2; EHMT1; EHMT2	CTRP	0.55	1.17	sig-21185	BRD-K45681478	BRD-K45681478			CTRP	0.5	0.68	sig-20905	DAPORINAD	DAPORINAD	NAMPT inhibitor	NAMPT	GDSC	0.51	3.17	sig-21246	COMBRESTATIN A4; 2'-DEOXYCOMBRETASTATIN A1; COMBRETASTATIN 4; COMBRETASTATIN A-4	COMBRETASTATIN-A-4	Microtubule agent		PRISM	0.58	3.12
sig-21091	INDISULAM	INDISULAM	Cell cycle arrest; CDK inhibitor; Carbonic anhydrase IX inhibitor	CA9	CTRP	0.53	1.17	sig-21117	AT9283	AT-9283	Cell cycle arrest; Aurora kinase inhibitor	AURKA; AURKB; JAK2; JAK3; RPS6KA6; STK17A	PRISM	0.55	0.67	sig-21041	EPIRUBICIN; EPIRUBICIN EBEWE; 4'-EPIADRIAMYCIN; EPIADRIAMYCIN; PHARMORUBICIN	EPIRUBICIN	DNA replication inhibitor; Topoisomerase inhibitor; DNA damaging agent	CHD1; TOP2A	PRISM	0.5	3.13	sig-20907	TALAZOPARIB	TALAZOPARIB	PARP inhibitor	PARP1; PARP2	GDSC	0.44	3.01
sig-21382	SN-38	SN-38	DNA replication inhibitor; Topoisomerase inhibitor	TOP1	PRISM	0.59	1.11	sig-20980	TAXOL A; PACLITAXEL; 5BETA,20-EPOXY-1,2-ALPHA,4,7BETA,10BETA,13ALPHA-HEXAHYDROXYTAX-11-EN-9-ONE 4,10-DIACETATE 2-BENZOATE 13-ESTER WITH (2R,3S)-N-BENZOYL-3-PHENYLISOSERINE; PAXCEED	PACLITAXEL	Microtubule agent; Pro-apoptotic agent	BCL2; MAP2; MAP4; MAPT; NR1I2; TLR4; TUBB; TUBB1	CTRP	0.43	0.66	sig-20918	N-(2-AMINOPHENYL)-4-(N-(PYRIDIN-3-YLMETHOXYCARBONYL)AMINOMETHYL)BENZAMIDE; N-[[4-[(2-AMINOANILINO)-OXOMETHYL]PHENYL]METHYL]CARBAMIC ACID 3-PYRIDINYLMETHYL ESTER; ENTINOSTAT	ENTINOSTAT	Chromatin agent	HDAC1; HDAC2; HDAC3; HDAC6; HDAC8	GDSC	0.52	3.12	sig-21034	SU11274	SU11274	MET inhibitor	MET	CTRP	0.44	3
sig-21237	VX-680	VX-680	Cell cycle arrest; Aurora kinase inhibitor	AURKA; AURKB; AURKC	CTRP	0.51	1.09	sig-21094	5-FLUORO-2-DEOXYCYTIDINE; FDCYD; 5-FLUORODEOXYCYTIDINE; FCDR; 5-FLUORO-2'-DEOXYCYTIDINE	FDCYD	DNA methyltransferase inhibitor		PRISM	0.47	0.65	sig-21406	BRD-K97651142	BRD-K97651142	Aphrocallistin derivative		CTRP	0.44	3.01	sig-21211	NEURONAL DIFFERENTIATION INDUCER III	NEURONAL DIFFERENTIATION INDUCER III	Neuronal differentiation inducer		CTRP	0.57	2.97
sig-21317	BENZETHONIUM	BENZETHONIUM	Ion channel blocker	SCN10A	PRISM	0.58	1.08	sig-21394	GSK461364	GSK461364	Cell cycle arrest; PLK inhibitor	PLK1	PRISM	0.56	0.64	sig-20904	YK-4-279	YK-4-279	Transcription inhibitor	DHX9	GDSC	0.5	2.96	sig-21257	BRD-K70511574	BRD-K70511574	Cell cycle arrest; PLK inhibitor	PLK1	CTRP	0.44	2.93
sig-21245	BRD-K61166597	BRD-K61166597	Chromatin agent		CTRP	0.54	1.05	sig-21349	NILOTINIB	NILOTINIB	Fusion protein inhibitor; Multi-kinase inhibitor; ABL inhibitor; KIT inhibitor	ABL; ABL1; BCR; BCR-ABL1; KIT	CTRP	0.56	0.62	sig-21221	9-[(DIMETHYLAMINO)METHYL]-10-HYDROXY-(4S)-CAMPTOTHECIN; TOPOTECAN	TOPOTECAN	Topoisomerase inhibitor; DNA damaging agent; DNA replication inhibitor	TOP1	CTRP	0.43	2.95	sig-20912	PEVONEDISTAT	PEVONEDISTAT	NAE inhibitor	NAE1	GDSC	0.45	2.92
sig-21436	NAVITOCLAX:BIRINAPANT (1:1 MOL/MOL)	NAVITOCLAX:BIRINAPANT (1:1 MOL/MOL)	Combination drug; Pro-apoptotic agent	BCL2; BCL2L1; BCL2L2; DIABLO; XIAP	CTRP	0.45	1.05	sig-21233	AZD-6482	AZD6482	PI3K/AKT/mTOR signaling inhibitor	PIK3CB; PIK3CD	CTRP	0.56	0.61	sig-20890	ALISERTIB	ALISERTIB	Cell cycle arrest; Aurora kinase inhibitor	AURKA; AURKB	GDSC	0.47	2.92	sig-21435	TANESPIMYCIN:GEMCITABINE (1:1 MOL/MOL)	TANESPIMYCIN:GEMCITABINE (1:1 MOL/MOL)	DNA replication inhibitor; Combination drug; HSP inhibitor	CMPK1; HSP90AA1; RRM1; TYMS	CTRP	0.57	2.88
sig-21422	ALISERTIB:NAVITOCLAX (2:1 MOL/MOL)	ALISERTIB:NAVITOCLAX (2:1 MOL/MOL)	Combination drug; Cell cycle arrest; Pro-apoptotic agent	AURKA; AURKB; BCL2; BCL2L1; BCL2L2	CTRP	0.53	1.02	sig-21215	BYL-719	BYL-719	PI3K/AKT/mTOR signaling inhibitor	PIK3CA	CTRP	0.54	0.61	sig-21000	HYPOESTOXIDE	HYPOESTOXIDE	NFkB signaling inhibitor	IKBKB; IL1B; TNF	PRISM	0.51	2.89	sig-21007	YK 4-279	YK 4-279	Transcription inhibitor	DHX9; ERG; ETV1	CTRP	0.52	2.88
sig-21170	TRIPTOLIDE	TRIPTOLIDE	Transcription inhibitor	RELA	PRISM	0.58	1.01	sig-21128	METATINIB	METATINIB	Protein fusion inhibitor	ABL1; BCR; BCR-ABL1	PRISM	0.56	0.6	sig-20970	PROPANOLOL; SUMIAL; PROPANALOL; CIPLAR; 1-((1-METHYLETHYL)AMINO)-3-(1-NAPHTHALENYLOXY)-2-PROPANOL; PROPHYLUX; 螔-PROPRANOLOL; ANGILOL; INNOPRAN; DERALIN; BETA-PROPRANOLOL; CARDINOL; BEDRANOL SR; DOCITON; INDOBLOC; DURANOL; 1-(ISOPROPYLAMINO)-3-(1-NAPHTHYLOXY)PROPAN-2-OL; PROPRANOLOL	PROPRANOLOL	Adrenergic receptor antagonist		PRISM	0.47	2.86	sig-21010	ISOEVODIAMINE	ISOEVODIAMINE	NFkB signaling inhibitor		CTRP	0.53	2.85
sig-21426	OXALATOPLATIN; OXALIPLATIN; DIAMINOCYCLOHEXANE OXALATOPLATINUM; OXALATOPLATINUM; L-OHP	OXALIPLATIN	DNA replication inhibitor; DNA damaging agent		CTRP	0.53	1.01	sig-21331	VANDETANIB; ZICTIFA ; ZACTIMA ; N-(4-BROMO-2-FLUOROPHENYL)-6-METHOXY-7-((1-METHYL-4-PIPERIDINYL)METHOXY)-4-QUINAZOLINAMINE; N-(4-BROMO-2-FLUOROPHENYL)-6-METHOXY-7-((1-METHYLPIPERIDIN-4-YL)METHOXY)QUINAZOLIN-4-AMINE	VANDETANIB	ErbB inhibitor; VEGFR inhibitor; RET inhibitor; Multi-kinase inhibitor	EGFR; KDR	CTRP	0.54	0.6	sig-21426	OXALATOPLATIN; OXALIPLATIN; DIAMINOCYCLOHEXANE OXALATOPLATINUM; OXALATOPLATINUM; L-OHP	OXALIPLATIN	DNA replication inhibitor; DNA damaging agent		CTRP	0.53	2.83	sig-21224	DACINOSTAT	DACINOSTAT	Chromatin agent	HDAC1; HDAC2; HDAC3; HDAC4; HDAC5; HDAC6; HDAC7; HDAC8; HDAC9	PRISM	0.48	2.84
sig-21300	ISOX	ISOX	Chromatin agent	HDAC6	CTRP	0.52	1.01	sig-21092	PD-168393	PD-168393	ErbB inhibitor	EGFR; ERBB2; SRC	PRISM	0.54	0.59	sig-21232	FK-866	FK-866	NAMPT inhibitor	NAMPT	PRISM	0.54	2.8	sig-21040	MERCK60	MERCK60	Chromatin agent	HDAC1; HDAC2	CTRP	0.51	2.81
sig-21047	AM-580	AM-580	Retinoid acid receptor agonist	RARA	CTRP	0.49	1	sig-21103	MEFEXAMIDE	MEFEXAMIDE	Psychoactive drug		PRISM	0.43	0.58	sig-20889	WEE1 INHIBITOR	WEE1 INHIBITOR	Cell cycle arrest; Cell cycle checkpoint inhibitor	CHEK1; WEE1	GDSC	0.51	2.78	sig-20997	WYE-125132	WYE-125132	PI3K/AKT/mTOR signaling inhibitor	MTOR	PRISM	0.47	2.76
sig-21354	1-N'-BENZENECARBOTHIOYL-3-(2-BENZENECARBOTHIOYL-2-METHYLHYDRAZINYL)-N'-METHYL-OXOPROPANEHYDRAZIDIDE; ELESCLOMOL	ELESCLOMOL	ROS/RNS inducer; ROS/RNS modulator	HSPA1A	PRISM	0.57	0.99									sig-20941	N-DEBENZOYL-N-(TERT-BUTOXYCARBONYL)-10-DEACETYLTAXOL; DOCETAXEL ANHYDROUS; TXL; DOCETAXEL; N-DEBENZOYL-N-(TERT-BUTOXYCARBONYL)-10-DEACETYLPACLITAXEL	DOCETAXEL	Microtubule agent	BCL2; MAP2; MAP4; MAPT; NR1I2; TUBB; TUBB1	GDSC	0.46	2.73	sig-21150	BMS-536924	BMS-536924	IGF1R signaling inhibitor	IGF1R; INSR	CTRP	0.55	2.75
																sig-21208	GDC-0941	GDC-0941	PI3K/AKT/mTOR signaling inhibitor	PIK3CA; PIK3CB; PIK3CD; PIK3CG	PRISM	0.55	2.72	sig-21347	TANESPIMYCIN; 17AAG	TANESPIMYCIN	HSP inhibitor	HSP90AA1	PRISM	0.53	2.74
																sig-21458	CROMAKALIM	CROMAKALIM	Ion channel activator	KCNJ8	PRISM	0.5	2.72	sig-21155	BRD-K35604418	BRD-K35604418	Pro-apoptotic agent	MCL1	CTRP	0.42	2.73
																sig-21273	PHA-793887	PHA-793887	Cell cycle arrest; CDK inhibitor	CDK1; CDK2; CDK4; CDK5; CDK7; CDK9	PRISM	0.55	2.71	sig-20936	9-[(DIMETHYLAMINO)METHYL]-10-HYDROXY-(4S)-CAMPTOTHECIN; TOPOTECAN	TOPOTECAN	DNA replication inhibitor; Topoisomerase inhibitor; DNA damaging agent	TOP1	GDSC	0.47	2.72
																sig-21238	TOZASERTIB	TOZASERTIB	Cell cycle arrest; Aurora kinase inhibitor	AURKA; AURKB; AURKC; LCK	PRISM	0.51	2.68

[truncated: 1 more sheets: sTable11]
